# Supplementary material for: Hydrophosphinylation of unactivated alkenes with secondary phosphine oxides under visible-light photocatalysis
Source: Royal Society of Chemistry journal article supplement (doi:10.1039/c3gc40482j), 2013-01-01
Supplement: c3gc40482j.pdf [file c3gc40482j.pdf]

## **Electronic Supplementary Information**

### ***Hydrophosphinylation of Unactivated Alkenes with Secondary Phosphine Oxides Under Visible-Light Photocatalysis***

*Woo-Jin Yoo, and Shū Kobayashi*

Department of Chemistry, School of Science, The University of Tokyo, 7-3-1, Hongo, Bunkyo-ku, Tokyo, 113-0033, Japan

### **Contents**

|           |                                                                                                                  |      |
|-----------|------------------------------------------------------------------------------------------------------------------|------|
| Part I:   | Substrate Scope for the Hydrophosphinylation of SPOs to Unactivated Alkenes Using Rhodamine B as a Catalyst..... | S-2  |
| Part II:  | NMR Spectra of <b>3a-j</b> .....                                                                                 | S-6  |
| Part III: | References .....                                                                                                 | S-37 |

**General Information:**  $^1\text{H}$  and  $^{13}\text{C}$  NMR spectra were recorded on a JEOL ECX-500 in  $\text{CDCl}_3$ . Chemical shifts were reported in parts per million (ppm) from tetramethylsilane using the solvent resonance as the internal standard (chloroform:  $\delta$  7.26 ppm) for  $^1\text{H}$  NMR and (deuteriochloroform:  $\delta$  77.0 ppm) for  $^{13}\text{C}$  NMR.  $^{31}\text{P}$  NMR spectra were referenced to external  $\text{H}_3\text{PO}_4$  ( $\delta$  0 ppm). IR spectra were measured on a JASCO FT/IR-610 spectrometer. High-resolution mass spectrometry was carried out using a JEOL JMS-T100TD (DART). Preparative thin-layer chromatography (PTLC) was carried out using Wakogel B-5F from Wako Pure Chemical Industries, Ltd.

**Reagents:** Unless stated otherwise, commercial reagents were used as received. Secondary phosphine oxides **1b-1f** used in this study were prepared according to known literature procedure.<sup>1</sup>

### Part I: Substrate Scope for the Hydrophosphinylation of SPOs to Unactivated Alkenes Using Rhodamine B as a Catalyst

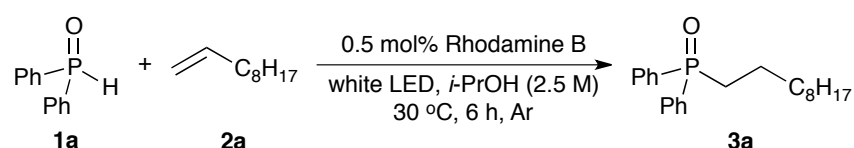

In a 2 mL screw-cap vial was added rhodamine B (0.0012 g, 0.0025 mmol, 0.5 mol%), SPO **1a** (0.1011 g, 0.5000 mmol), alkene **2a** (100  $\mu\text{L}$ , 0.497 mmol), and *i*-PrOH (0.2 mL). The vial was quickly flushed with argon and then was stirred for 6 h in a water bath (30  $^\circ\text{C}$ ) under a white LED lamp (Toshiba E-CORE LDA7N/2). Then, the reaction mixture was passed through a plug of silica gel, concentrated under reduced pressure, and the resulting residue was purified by preparative TLC (EtOAc) to afford the addition product **3a** (0.1526 g, 0.4456 mmol, 89%) as a white solid.

**Decyldiphenylphosphine oxide (3a) (Table 3, entry 1).**  $^1\text{H}$  NMR ( $\text{CDCl}_3$ , 500 MHz)  $\delta$  7.71-7.68 (m, 4H), 7.49-7.40 (m, 6H), 2.24-2.19 (m, 2H), 1.60-1.55 (m, 2H), 1.37-1.32 (m, 2H), 1.25-1.18 (m, 12H), 0.83 (t, 3H,  $J = 6.9$  Hz);  $^{13}\text{C}$  NMR ( $\text{CDCl}_3$ , 125 MHz)  $\delta$  133.4 (d,  $J_{\text{C-P}} = 98.0$  Hz), 131.8, 130.9 (d,  $J_{\text{C-P}} = 9.6$  Hz), 128.8 (d,  $J_{\text{C-P}} = 10.6$  Hz), 32.0, 31.1 (d,  $J_{\text{C-P}} = 15.0$  Hz), 29.9 (d,  $J_{\text{C-P}} = 72.0$  Hz), 29.6 (d,  $J_{\text{C-P}} = 19.2$  Hz), 29.4, 29.2, 22.8, 21.6, 21.5, 14.3;  $^{31}\text{P}$  NMR ( $\text{CDCl}_3$ , 200 MHz)  $\delta$  33.1. This is a known compound and the spectral data are identical to those reported in the literature.<sup>2</sup>

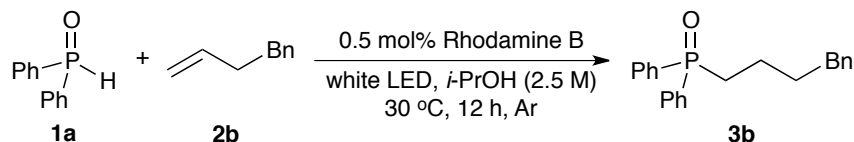

**Diphenyl(4-phenylbutyl)phosphine oxide (3b) (Table 3, entry 2).** Following the above general procedure with **2b** (75  $\mu\text{L}$ , 0.499 mmol) for 12 h. The crude reaction mixture was purified by preparative TLC (EtOAc) to provide **3b** (0.0979 g, 0.293 mmol, 59%) as a white solid.  $^1\text{H}$  NMR ( $\text{CDCl}_3$ , 500 MHz)  $\delta$  7.76-7.71 (m, 4H), 7.54-7.45 (m, 6H), 7.28-7.24 (m, 2H), 7.19-7.11 (m, 3H), 2.60 (t, 2H,  $J = 7.4$  Hz), 2.32-2.27 (m, 2H), 1.78-1.66 (m, 4H);  $^{13}\text{C}$  NMR ( $\text{CDCl}_3$ , 125 MHz)  $\delta$  142.1, 133.3 (d,  $J_{\text{C-P}} = 98.0$  Hz), 131.8, 131.0 (d,  $J_{\text{C-P}} = 8.8$  Hz), 128.8 (d,  $J_{\text{C-P}} = 11.4$  Hz), 128.5, 126.0, 35.5, 32.9 (d,  $J_{\text{C-P}} = 14.4$  Hz), 29.8 (d,  $J_{\text{C-P}} = 71.6$  Hz), 21.4;  $^{31}\text{P}$  NMR ( $\text{CDCl}_3$ , 200 MHz)  $\delta$  32.9. This is a known compound and the spectral data are identical to those reported in the literature.<sup>3</sup>

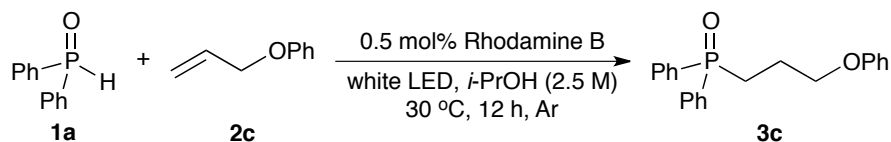

**(3-Phenoxypropyl)diphenylphosphine oxide (3c) (Table 3, entry 3).** Following the above general procedure with **2c** (69  $\mu\text{L}$ , 0.503 mmol) for 12 h. The crude reaction mixture was purified by preparative TLC (EtOAc) to provide **3c** (0.1514 g, 0.450 mmol, 90%) as a white solid.  $^1\text{H}$  NMR ( $\text{CDCl}_3$ , 500 MHz)  $\delta$  7.76-7.71 (m, 4H), 7.51-7.41 (m, 6H), 7.25-7.21 (m, 2H), 6.92-6.89 (m, 1H), 6.83-6.81 (m, 2H), 3.98 (t,  $J = 5.9$  Hz), 2.49-2.44 (m, 2H), 2.14-2.06 (m, 1H);  $^{13}\text{C}$  NMR ( $\text{CDCl}_3$ , 125 MHz)  $\delta$  158.8, 133.1 (d,  $J_{\text{C-P}} = 98.4$  Hz), 132.0, 131.0 (d,  $J_{\text{C-P}} = 9.0$  Hz), 129.6, 128.9 (d,  $J_{\text{C-P}} = 12.0$  Hz), 121.0, 114.6, 67.6 (d,  $J_{\text{C-P}} = 14.4$  Hz), 26.6 (d,  $J_{\text{C-P}} = 73.2$  Hz), 22.0;  $^{31}\text{P}$  NMR ( $\text{CDCl}_3$ , 200 MHz)  $\delta$  33.0. This is a known compound and the spectral data are identical to those reported in the literature.<sup>3</sup>

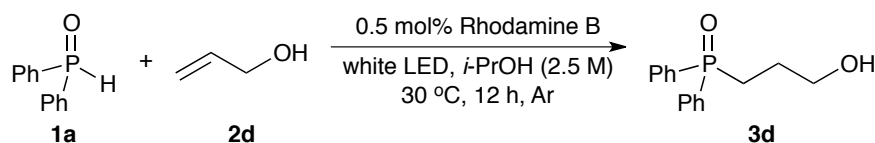

**(3-Hydroxypropyl)diphenylphosphine oxide (3d) (Table 3, entry 4).** Following the above general procedure with **2d** (34  $\mu\text{L}$ , 0.500 mmol) for 12 h. The crude reaction mixture was purified by preparative TLC (MeOH:DCM = 5:95) to provide **3d** (0.1145 g, 0.440 mmol, 88%) as a white solid.  $^1\text{H}$  NMR ( $\text{CDCl}_3$ , 500 MHz)  $\delta$  7.75-7.68 (m, 4H), 7.52-7.41 (m, 6H), 4.16 (bs, 1H), 3.66 (t,  $J = 5.6$  Hz), 2.38 (m, 2H), 1.88-1.80 (m, 2H);  $^{13}\text{C}$  NMR ( $\text{CDCl}_3$ , 125 MHz)  $\delta$  132.5 (d,  $J_{\text{C-P}} = 99.0$  Hz), 132.0, 131.0 (d,  $J_{\text{C-P}} = 10.0$  Hz), 128.9 (d,  $J_{\text{C-P}} = 11.4$  Hz), 62.6 (d,  $J_{\text{C-P}} = 10.2$  Hz), 27.6 (d,  $J_{\text{C-P}} = 72.0$  Hz), 25.5;  $^{31}\text{P}$  NMR ( $\text{CDCl}_3$ , 200 MHz)  $\delta$  35.3. This is a known compound and the spectral data are identical to those reported in the literature.<sup>4</sup>

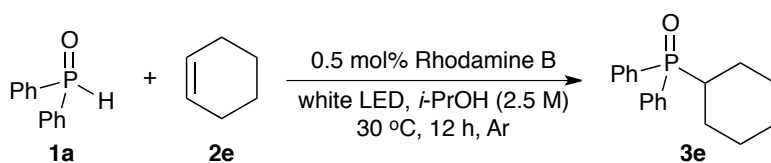

**Cyclohexyldiphenylphosphine oxide (3e) (Table 3, entry 5).** Following the above general procedure with **2e** (100  $\mu\text{L}$ , 0.987 mmol) for 12 h. The crude reaction mixture was purified by preparative TLC (EtOAc) to provide **3e** (0.0916 g, 0.322 mmol, 64%) as a white solid.  $^1\text{H}$  NMR ( $\text{CDCl}_3$ , 500 MHz)  $\delta$  7.76-7.72 (m, 4H), 7.47-7.39 (m, 6H), 2.23-2.16 (m, 1H), 1.77-1.66 (m, 5H), 1.54-1.45 (m, 2H), 1.26-1.16 (m, 3H);  $^{13}\text{C}$  NMR ( $\text{CDCl}_3$ , 125 MHz)  $\delta$  132.2 (d,  $J_{\text{C-P}} = 94.0$  Hz), 131.6, 131.2 (d,  $J_{\text{C-P}} = 9.0$  Hz), 128.7 (d,  $J_{\text{C-P}} = 10.8$  Hz), 37.3 (d,  $J_{\text{C-P}} = 74.0$  Hz), 26.5 (d,  $J_{\text{C-P}} = 13.0$  Hz), 25.9, 24.9;  $^{31}\text{P}$  NMR ( $\text{CDCl}_3$ , 200 MHz)  $\delta$  34.9. This is a known compound and the spectral data are identical to those reported in the literature.<sup>3</sup>

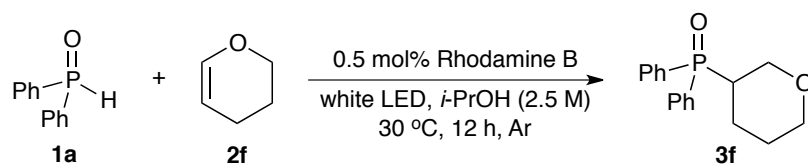

**Diphenyl(tetrahydro-2H-pyran-3-yl)phosphine oxide (3f) (Table 3, entry 6).** Following the above general procedure with **2f** (91  $\mu$ L, 1.00 mmol) for 12 h. The crude reaction mixture was purified by preparative TLC (MeOH:DCM = 1:9) to provide **3f** (0.0830 g, 0.290 mmol, 58%) as a white solid.  $^1\text{H}$  NMR ( $\text{CDCl}_3$ , 500 MHz)  $\delta$  7.79-7.70 (m, 4H), 7.51-7.43 (m, 6H), 3.91-3.89 (m, 2H), 3.66-3.61 (m, 1H), 3.36 (td, 1H,  $J = 10.9, 3.9$  Hz), 2.62-2.55 (m, 1H), 1.91-1.62 (m, 4H);  $^{13}\text{C}$  NMR ( $\text{CDCl}_3$ , 125 MHz)  $\delta$  132.1, 132.0, 131.9, 131.8, 131.1 (d,  $J_{\text{C-P}} = 6.4$  Hz), 131.0 (d,  $J_{\text{C-P}} = 6.6$  Hz), 129.0 (d,  $J_{\text{C-P}} = 8.2$  Hz), 128.9 (d,  $J_{\text{C-P}} = 8.2$  Hz), 68.2, 67.0, 36.7 (d,  $J_{\text{C-P}} = 70.4$  Hz), 25.9 (d,  $J_{\text{C-P}} = 11.4$  Hz), 22.3;  $^{31}\text{P}$  NMR ( $\text{CDCl}_3$ , 200 MHz)  $\delta$  30.8. This is a known compound and the spectral data are identical to those reported in the literature.<sup>3</sup>

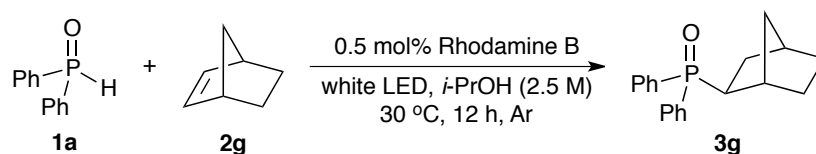

**Bicyclo[2.2.1]heptan-2-ylidiphenylphosphine oxide (3g) (Table 3, entry 7).** Following the above general procedure with **2g** (0.0942, 1.00 mmol) for 12 h. The crude reaction mixture was purified by preparative TLC (EtOAc) to provide **3g** (0.1262 g, 0.426 mmol, 85%) as a white solid.  $^1\text{H}$  NMR ( $\text{CDCl}_3$ , 500 MHz)  $\delta$  7.81-7.70 (m, 4H), 7.49-7.39 (m, 6H), 2.48 (bd, 1H,  $J = 7.9$  Hz), 2.34 (bs, 1H), 2.27 (t, 1H,  $J = 7.9$  Hz), 1.96-1.83 (m, 2H), 1.59-1.51 (m, 2H), 1.42-1.13 (m, 2H);  $^{13}\text{C}$  NMR ( $\text{CDCl}_3$ , 125 MHz)  $\delta$  133.9 (d,  $J_{\text{C-P}} = 95.4$  Hz), 133.6 (d,  $J_{\text{C-P}} = 95.4$  Hz), 131.54, 131.48, 131.14 (d,  $J_{\text{C-P}} = 8.4$  Hz), 131.08 (d,  $J_{\text{C-P}} = 9.6$  Hz), 128.7 (d,  $J_{\text{C-P}} = 12.0$  Hz), 128.6 (d,  $J_{\text{C-P}} = 12.0$  Hz), 40.1 (d,  $J_{\text{C-P}} = 72.8$  Hz), 38.3, 37.5, 36.6, 32.3 (d,  $J_{\text{C-P}} = 15.0$  Hz), 31.6 (d,  $J_{\text{C-P}} = 4.2$  Hz), 28.8;  $^{31}\text{P}$  NMR ( $\text{CDCl}_3$ , 200 MHz)  $\delta$  34.5. This is a known compound and the spectral data are identical to those reported in the literature.<sup>5</sup>

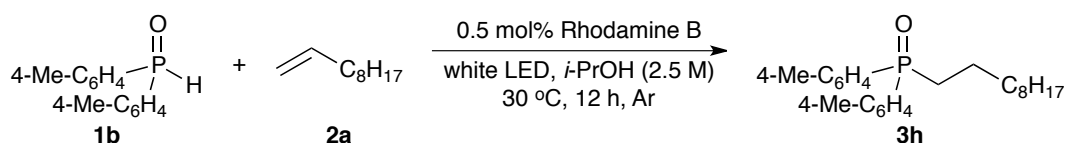

**Decyldi-*p*-tolylphosphine oxide (3h) (Table 3, entry 8).** Following the above general procedure with **1b** (0.1151, 0.500 mmol) for 12 h. The crude reaction mixture was purified by preparative TLC (EtOAc) to provide **3h** (0.1167 g, 0.315 mmol, 63%) as a white solid (m.p. = 45-46 °C).  $^1\text{H}$  NMR ( $\text{CDCl}_3$ , 500 MHz)  $\delta$  7.57 (4H, dd,  $J = 11.3, 7.7$  Hz), 7.23-7.21 (m, 4H), 2.34 (s, 6H), 2.20-2.14 (m, 2H), 1.56-1.53 (m, 2H), 1.34-1.11 (m, 14H), 0.82 (t, 3H,  $J = 7.0$  Hz);  $^{13}\text{C}$  NMR ( $\text{CDCl}_3$ , 125 MHz)  $\delta$  142.0, 130.9 (d,  $J_{\text{C-P}} = 9.6$  Hz), 130.3 (d,  $J_{\text{C-P}} = 100.2$  Hz), 129.4 (d,  $J_{\text{C-P}} = 12.0$  Hz), 32.0, 31.1 (d,  $J_{\text{C-P}} = 14.4$  Hz), 30.1 (d,  $J_{\text{C-P}} = 72.0$  Hz), 29.6, 29.5, 29.4, 29.2, 22.8, 21.7, 21.6 (d,  $J_{\text{C-P}} = 3.6$  Hz), 14.2;  $^{31}\text{P}$  NMR ( $\text{CDCl}_3$ , 200 MHz)  $\delta$  33.3; IR (KBr)  $\text{cm}^{-1}$  3043 (s), 3021 (s), 2849 (w), 1926 (s), 1659 (w), 1604 (s), 1501 (m), 1467 (s), 1401 (s), 1380 (m), 1174 (s), 1116 (s), 1099 (s); DART-HRMS ( $m/z$ ) calcd. for  $\text{C}_{24}\text{H}_{36}\text{O}_1\text{P}_1$  [ $(\text{M}+\text{H})^+$ ]: 371.25038, found: 371.25003.

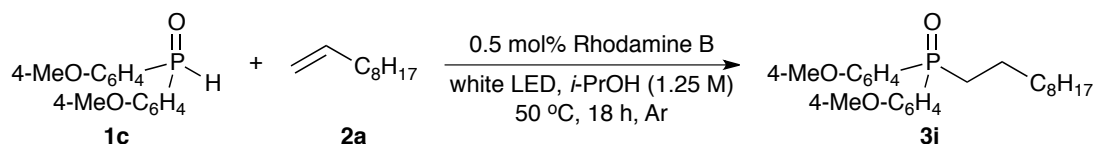

**Decylbis(4-methoxyphenyl)phosphine oxide (3i) (Table 3, entry 9).** Following the above general procedure with **1c** (0.1311, 0.500 mmol) and *i*-PrOH (0.4 mL) for 18 h at 50 °C. The crude reaction mixture was purified by preparative TLC (EtOAc) to provide **3i** (0.0547 g, 0.136 mmol, 27%) as a white solid (m.p. = 47-48 °C). <sup>1</sup>H NMR (CDCl<sub>3</sub>, 500 MHz) δ 7.60 (dd, 4H, *J* = 10.9, 8.3 Hz), 6.93-6.91 (m, 4H), 3.79 (s, 6H), 2.17-2.11 (m, 2H), 1.58-1.50 (m, 2H), 2.17-2.11 (m, 2H), 1.34-1.17 (m, 14H), 0.83 (t, 3H, *J* = 6.9 Hz); <sup>13</sup>C NMR (CDCl<sub>3</sub>, 125 MHz) δ 162.3, 132.7 (d, *J*<sub>C-P</sub> = 10.6 Hz), 124.9 (d, *J*<sub>C-P</sub> = 104.4 Hz), 114.3 (d, *J*<sub>C-P</sub> = 12.5 Hz), 55.5, 32.0, 31.2 (d, *J*<sub>C-P</sub> = 14.6 Hz), 30.4 (d, *J*<sub>C-P</sub> = 72.7 Hz), 29.7, 29.5, 29.4, 29.3, 22.8, 21.7, 14.3; <sup>31</sup>P NMR (CDCl<sub>3</sub>, 200 MHz) δ 33.1; IR (KBr) cm<sup>-1</sup> 2955 (m), 2921 (s), 2851 (s), 2050 (w), 1908 (w), 1599 (s), 1571 (m), 1501 (s), 1462 (m), 1295 (s), 1255 (s), 1174 (s); DART-HRMS (*m/z*) calcd. for C<sub>24</sub>H<sub>36</sub>O<sub>3</sub>P<sub>1</sub> [(*M*+*H*)<sup>+</sup>]: 403.24021, found: 403.24110.

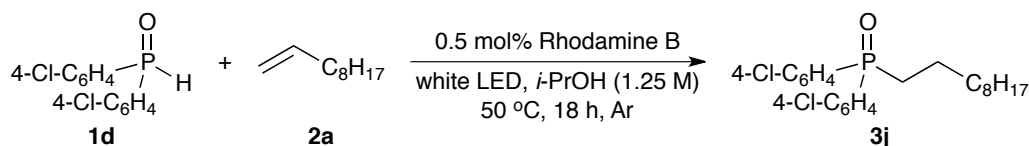

**Bis(4-chlorophenyl)(decyl)phosphine oxide (3j) (Table 3, entry 10).** Following the above general procedure with **1d** (0.1311, 0.500 mmol) and *i*-PrOH (0.4 mL) for 18 h at 50 °C. The crude reaction mixture was purified by preparative TLC (EtOAc) to provide **3j** (0.1295 g, 0.315 mmol, 63%) as a white solid (m.p. = 51-52 °C). <sup>1</sup>H NMR (CDCl<sub>3</sub>, 500 MHz) δ 7.63-7.59 (m, 4H), 7.43-7.39 (m, 4H), 2.21-2.15 (m, 2H), 1.57-1.51 (m, 2H), 1.36-1.31 (m, 2H), 1.25-1.00 (m, 12H), 0.82 (t, 3H, *J* = 7.0); <sup>13</sup>C NMR (CDCl<sub>3</sub>, 125 MHz) δ 138.6, 132.3 (d, *J*<sub>C-P</sub> = 10.0 Hz), 131.5 (d, *J*<sub>C-P</sub> = 99.0 Hz), 129.3 (d, *J*<sub>C-P</sub> = 12.0 Hz), 32.0, 31.1 (d, *J*<sub>C-P</sub> = 14.6 Hz), 30.1, 29.6, 29.5, 29.4, 29.2, 22.8, 21.4, 14.3; <sup>31</sup>P NMR (CDCl<sub>3</sub>, 200 MHz) δ 32.0; IR (KBr) cm<sup>-1</sup> 3052 (2), 2953 (s), 2850 (s), 1921 (w), 1718 (w), 1584 (m), 1483 (m), 1390 (m), 1184 (s), 1088 (s); DART-HRMS (*m/z*) calcd. for C<sub>22</sub>H<sub>30</sub>Cl<sub>2</sub>O<sub>1</sub>P<sub>1</sub> [(*M*+*H*)<sup>+</sup>]: 411.14113, found: 411.14016.

Part III: NMR Spectra of **3a-j**

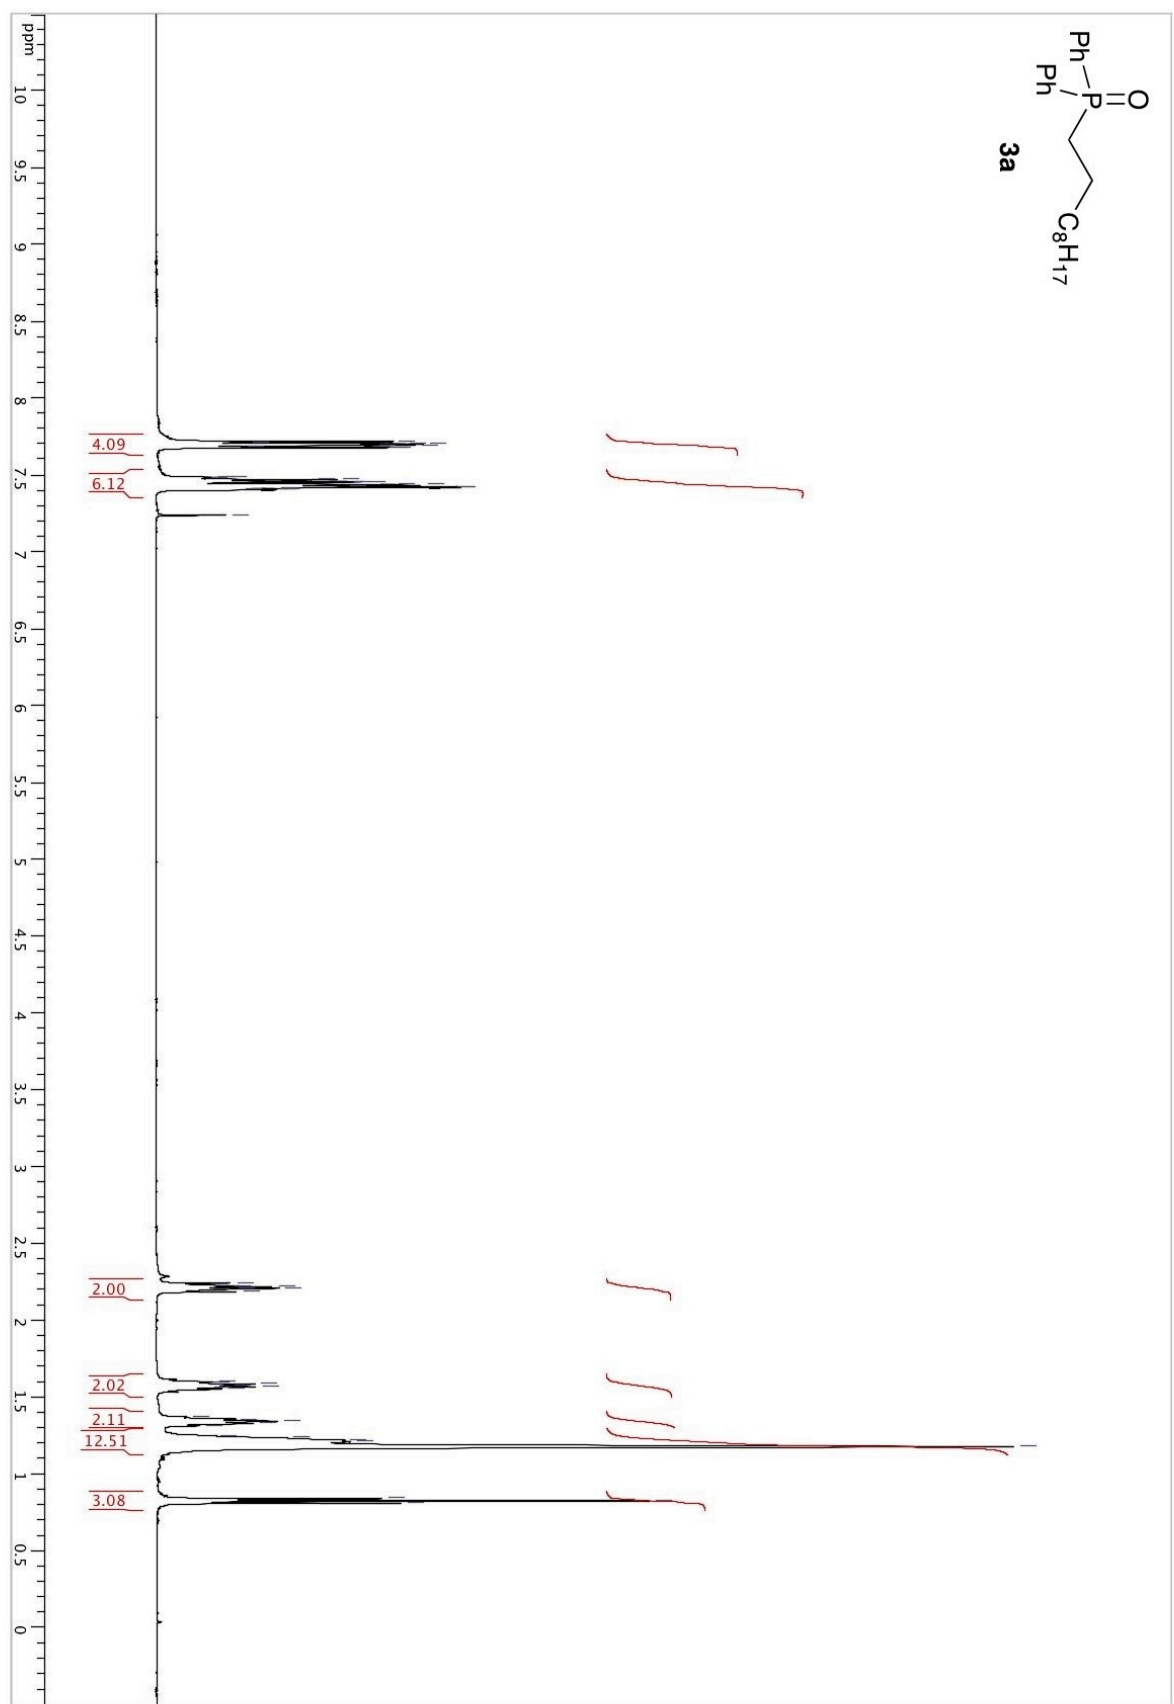

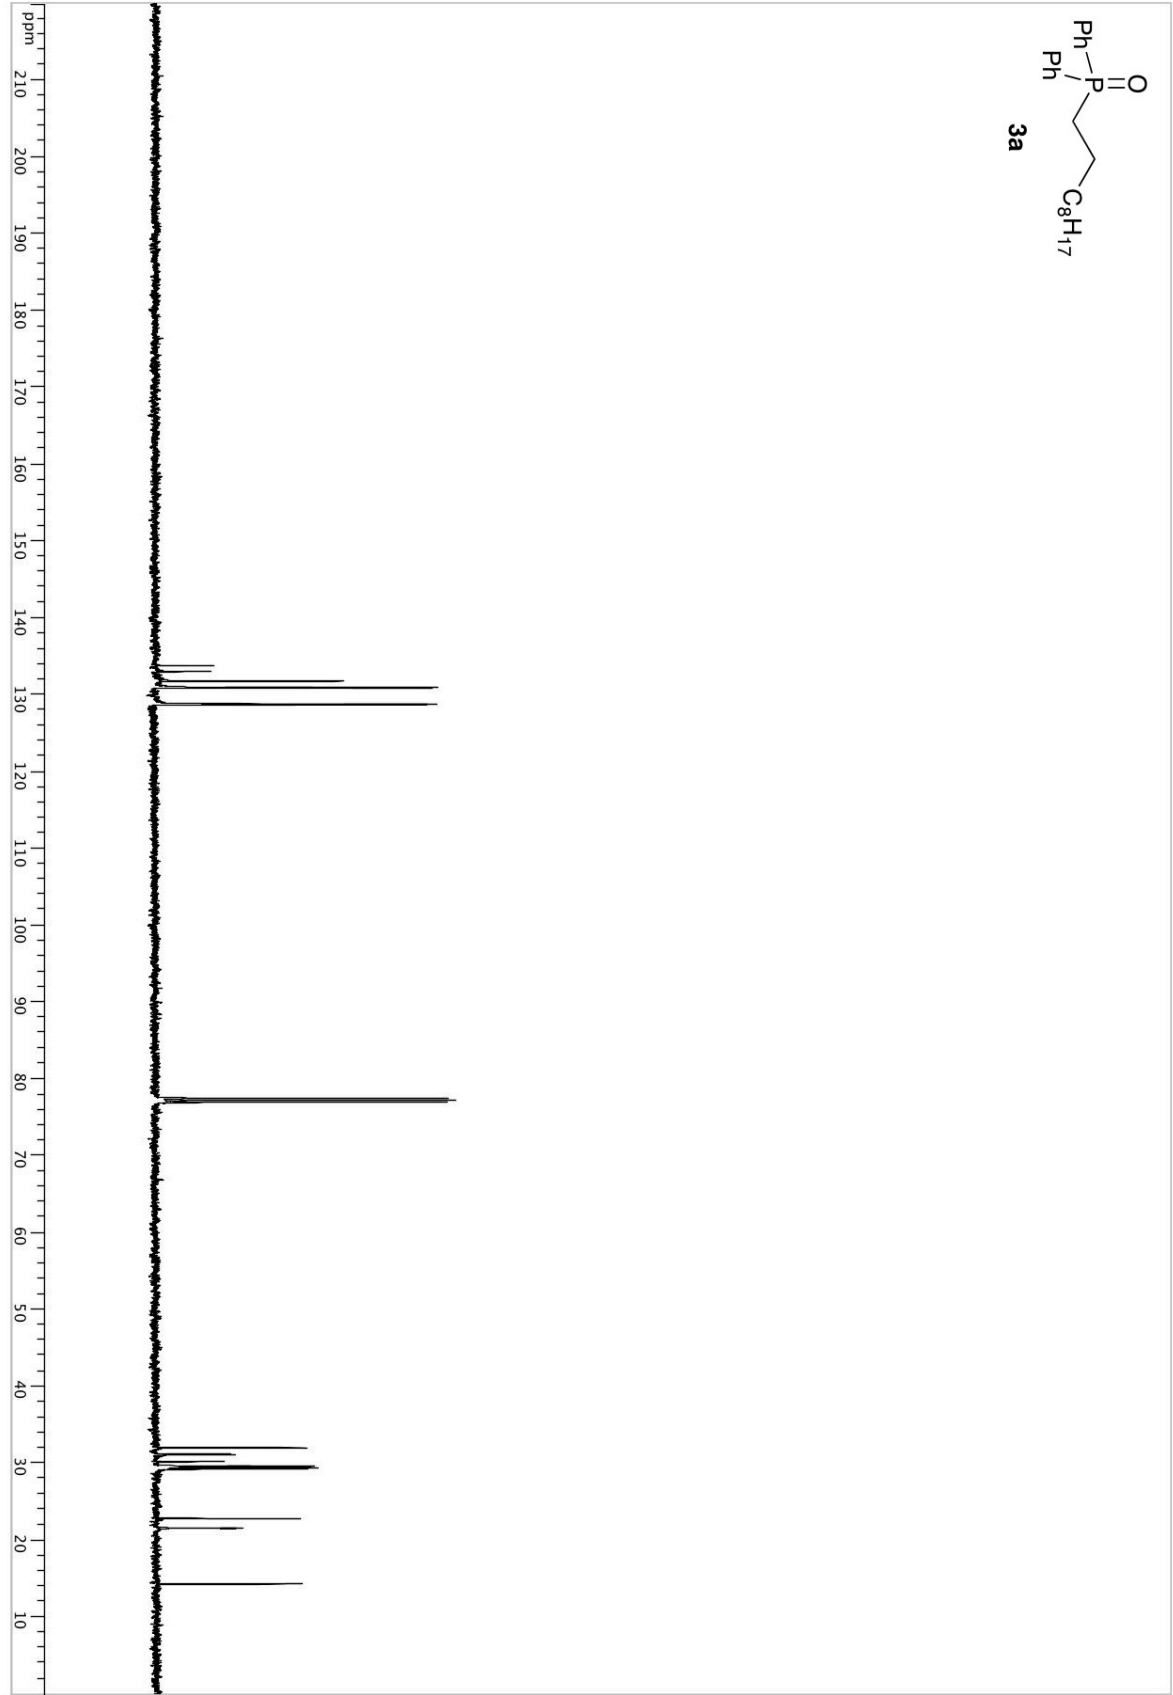



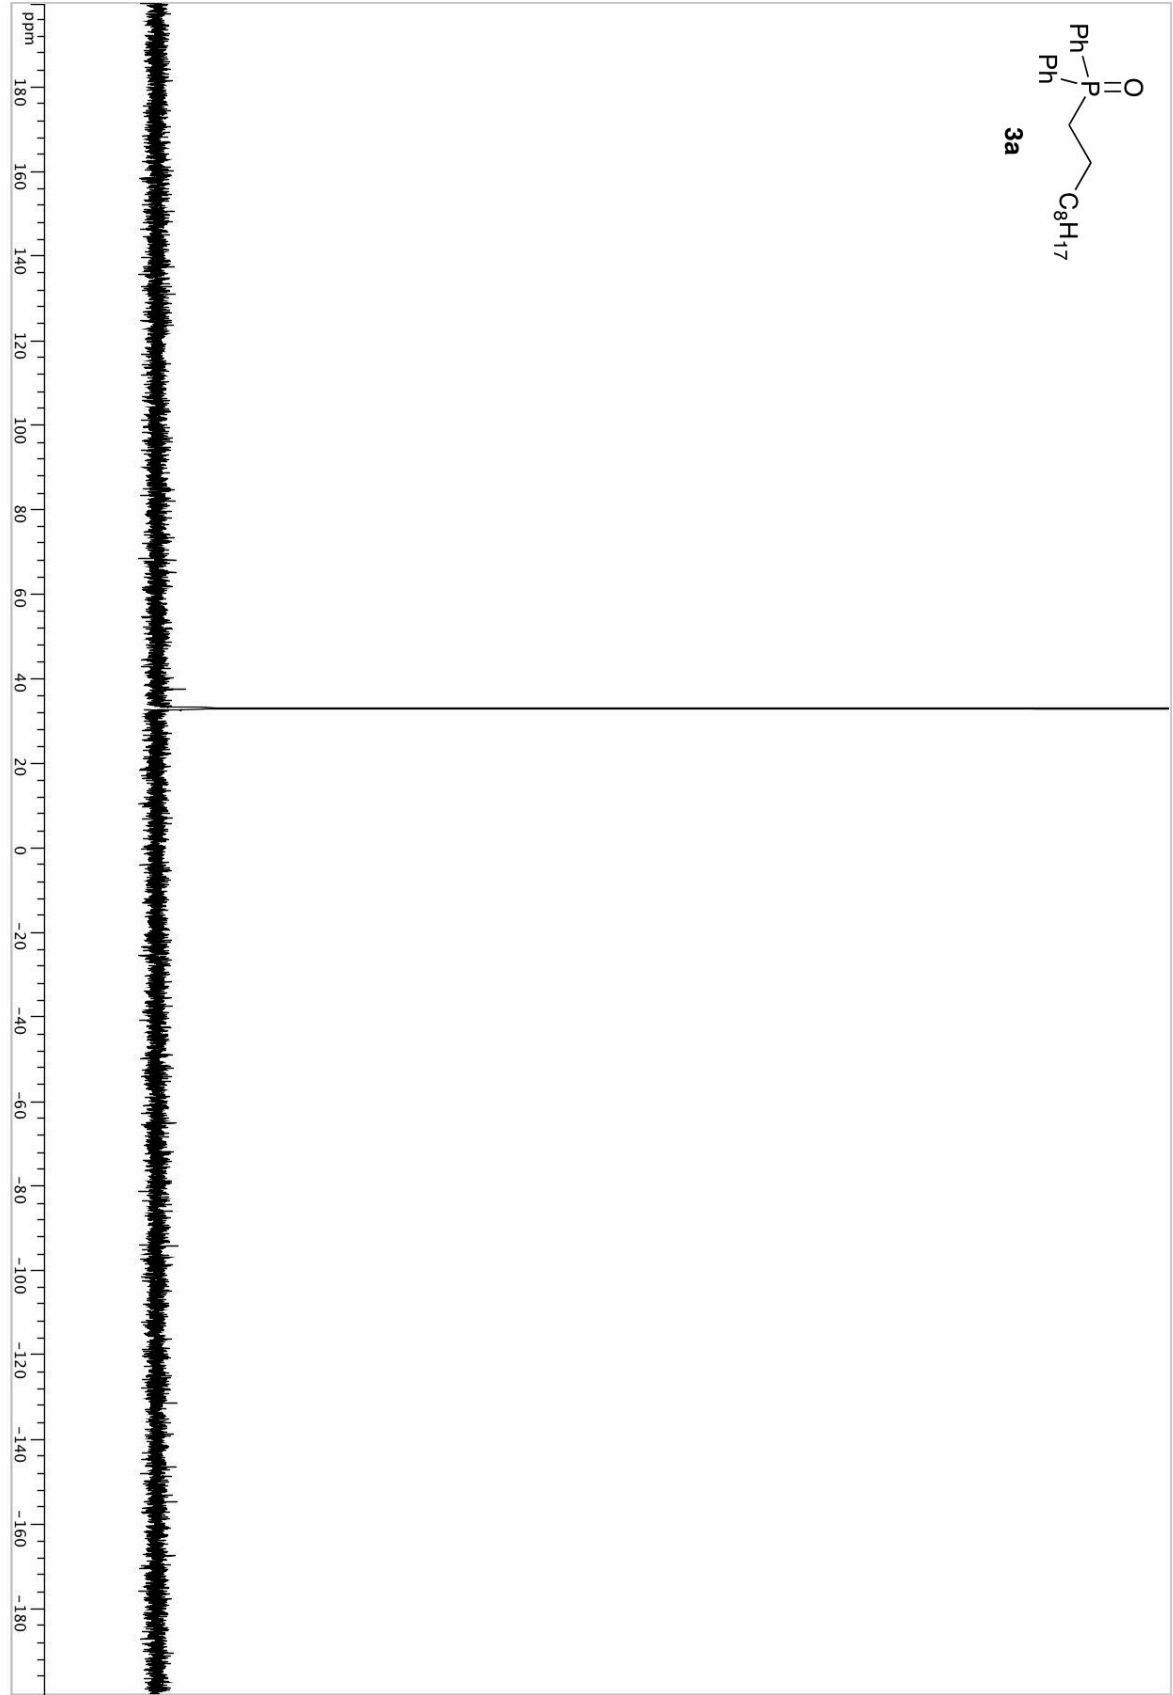

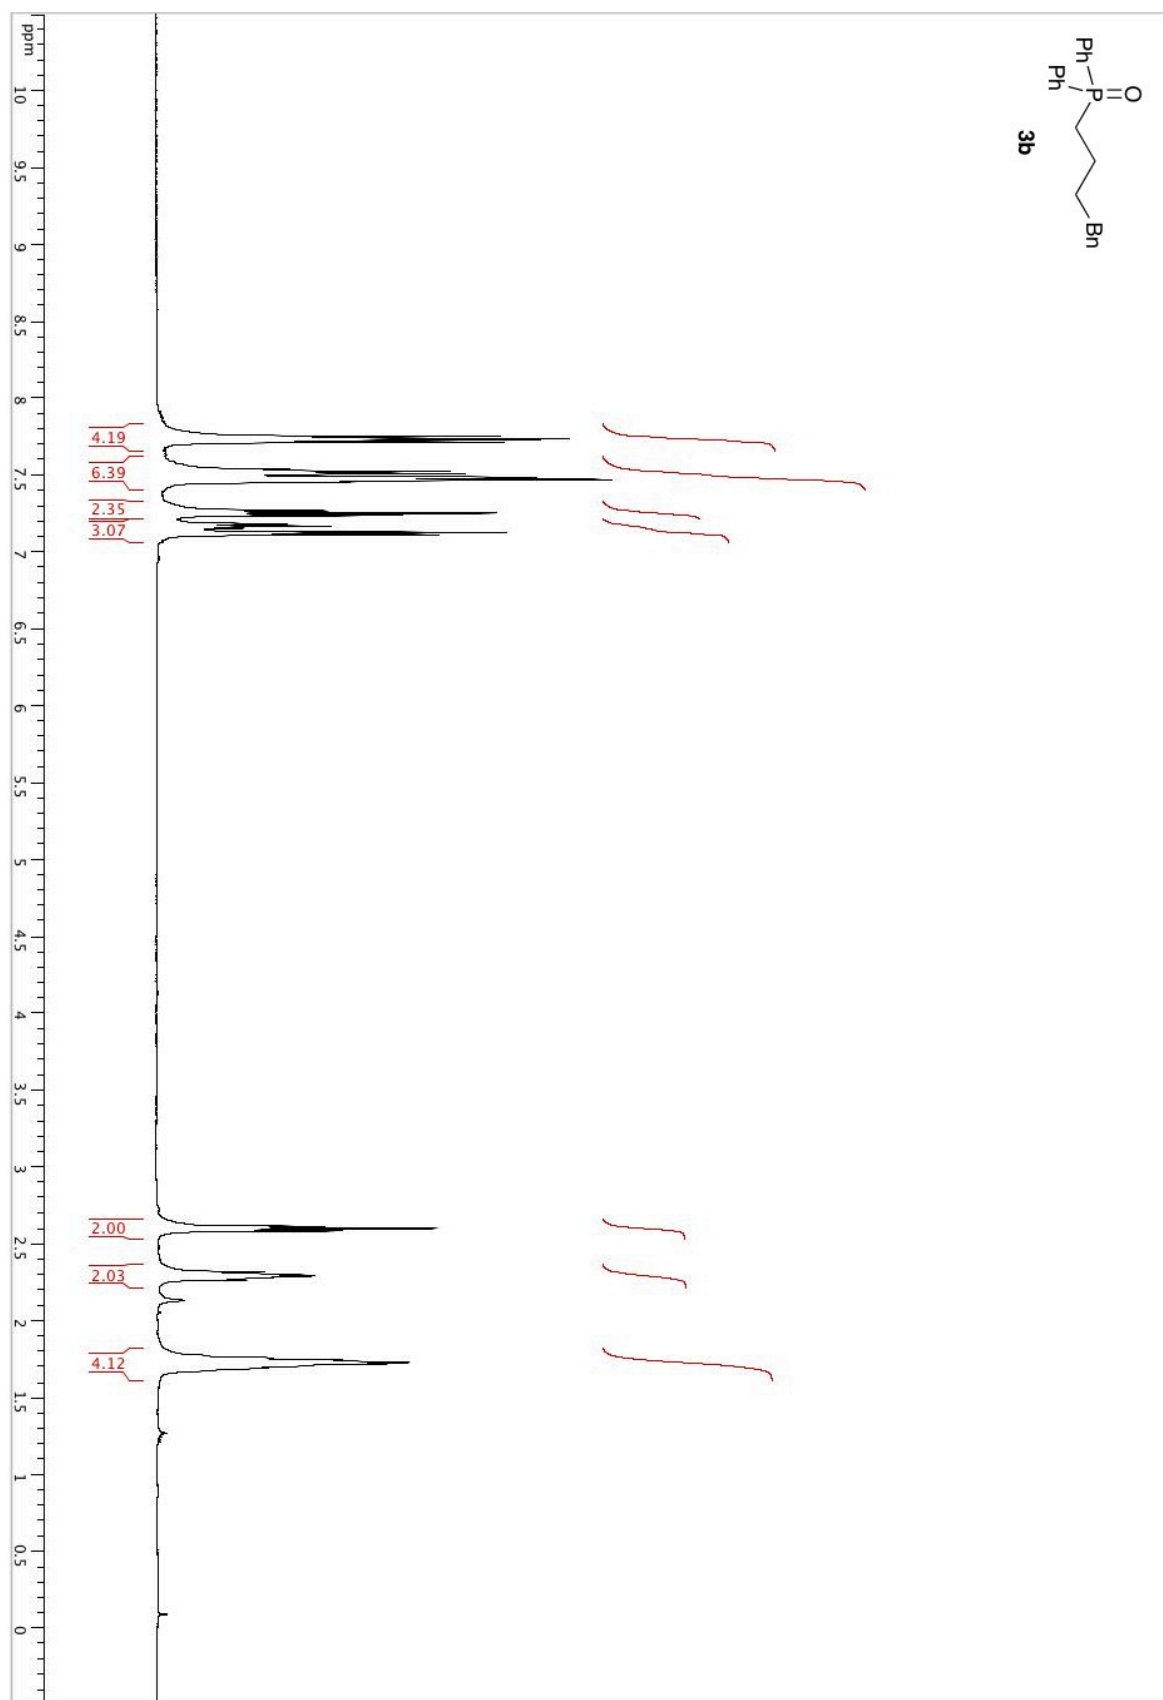

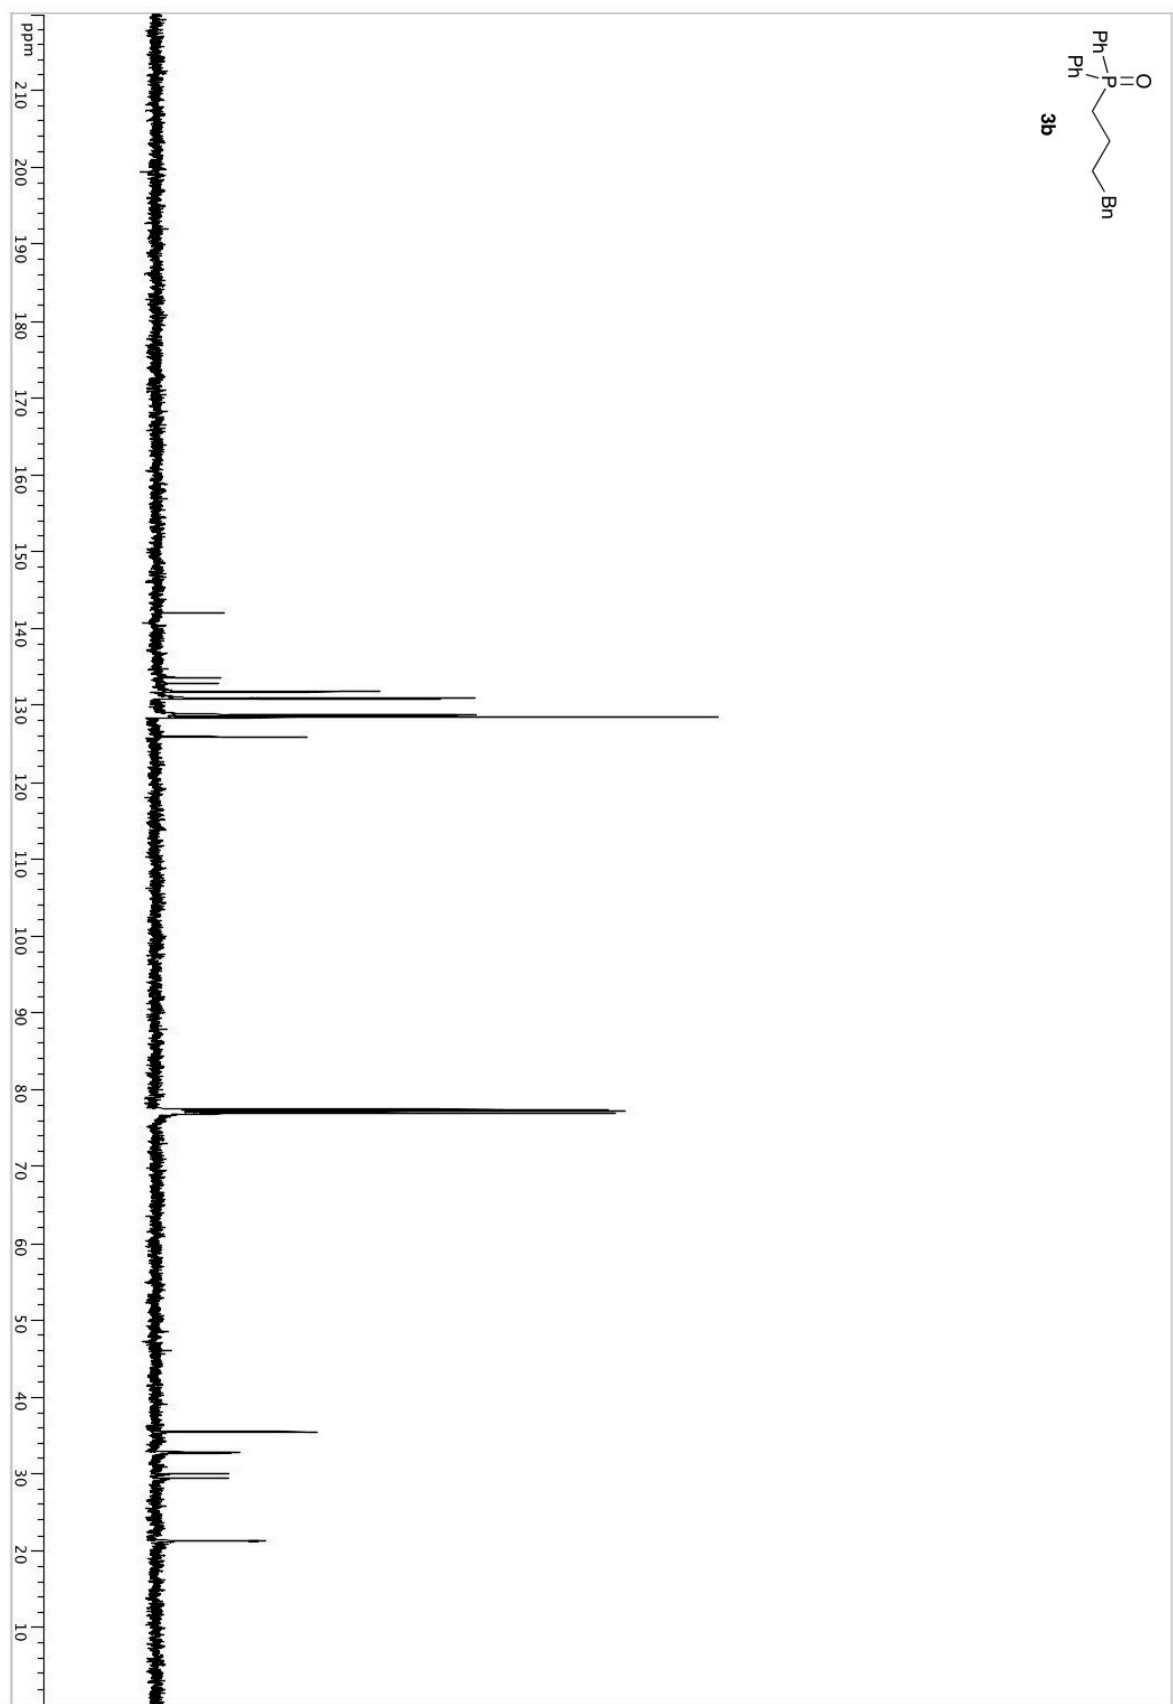

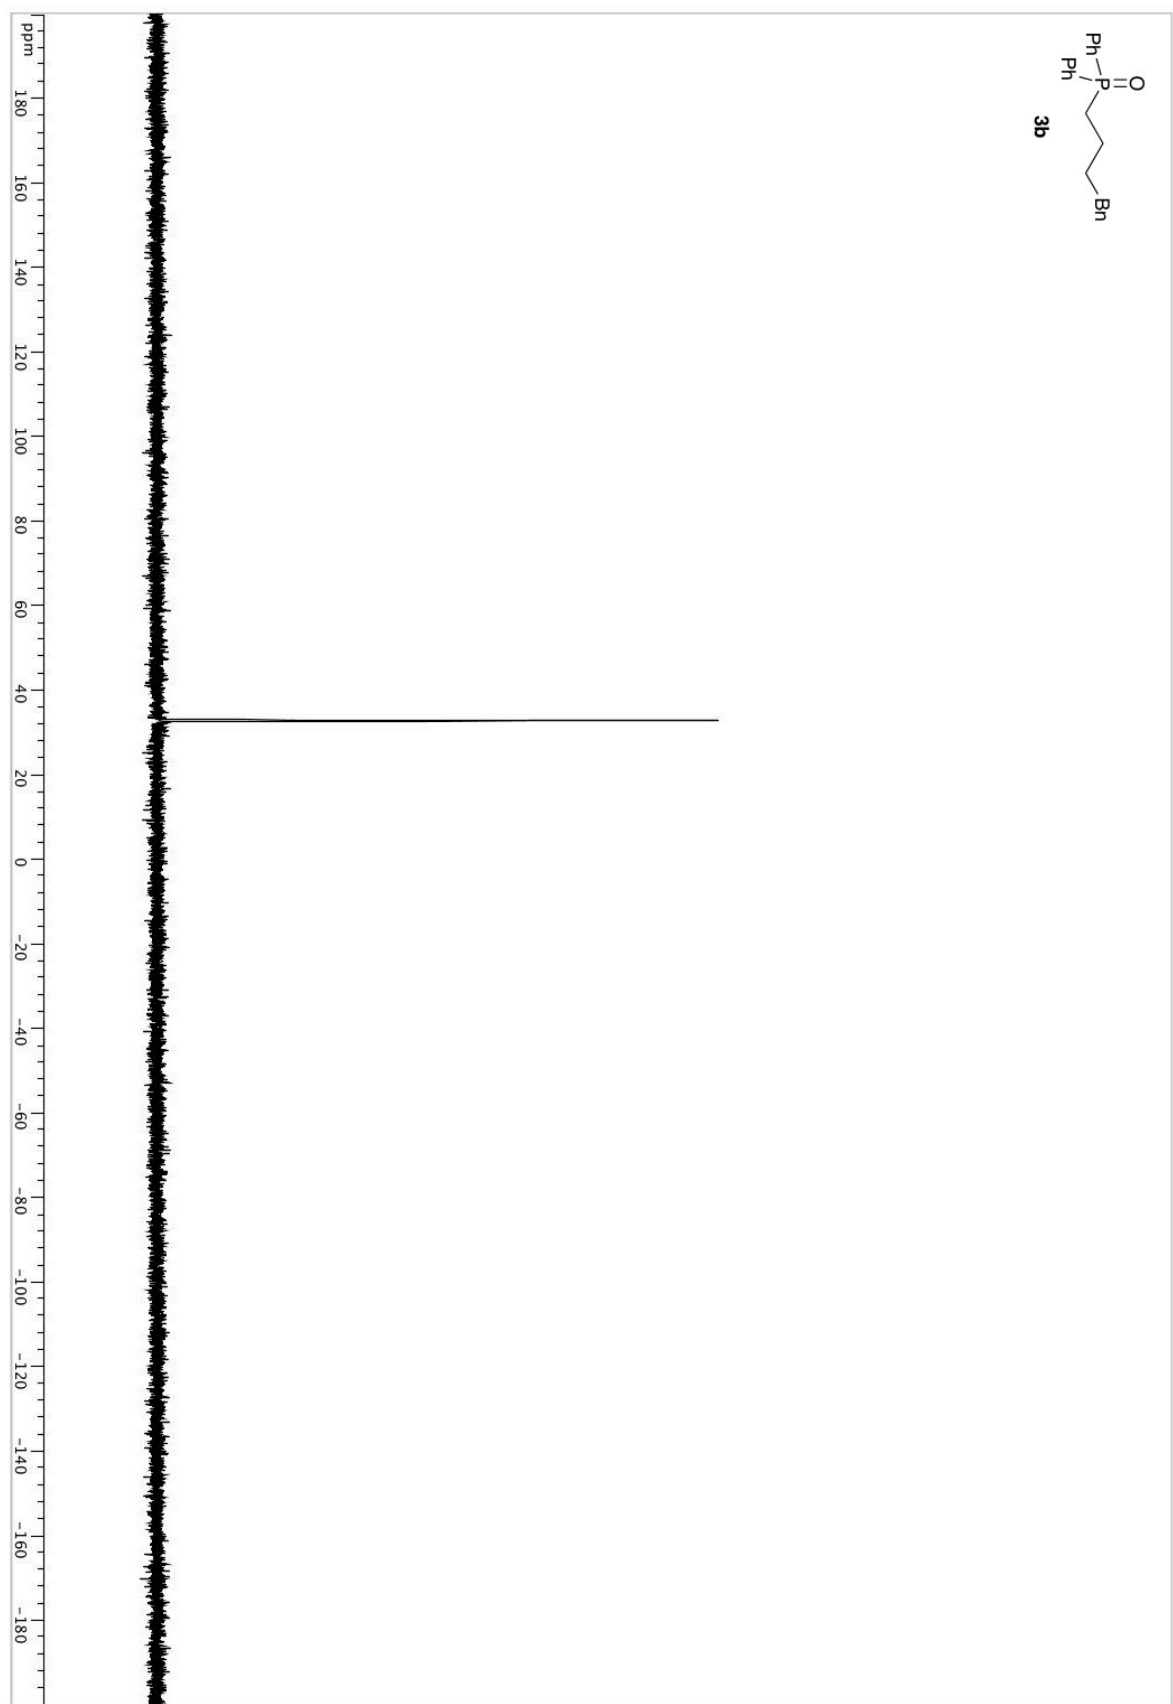

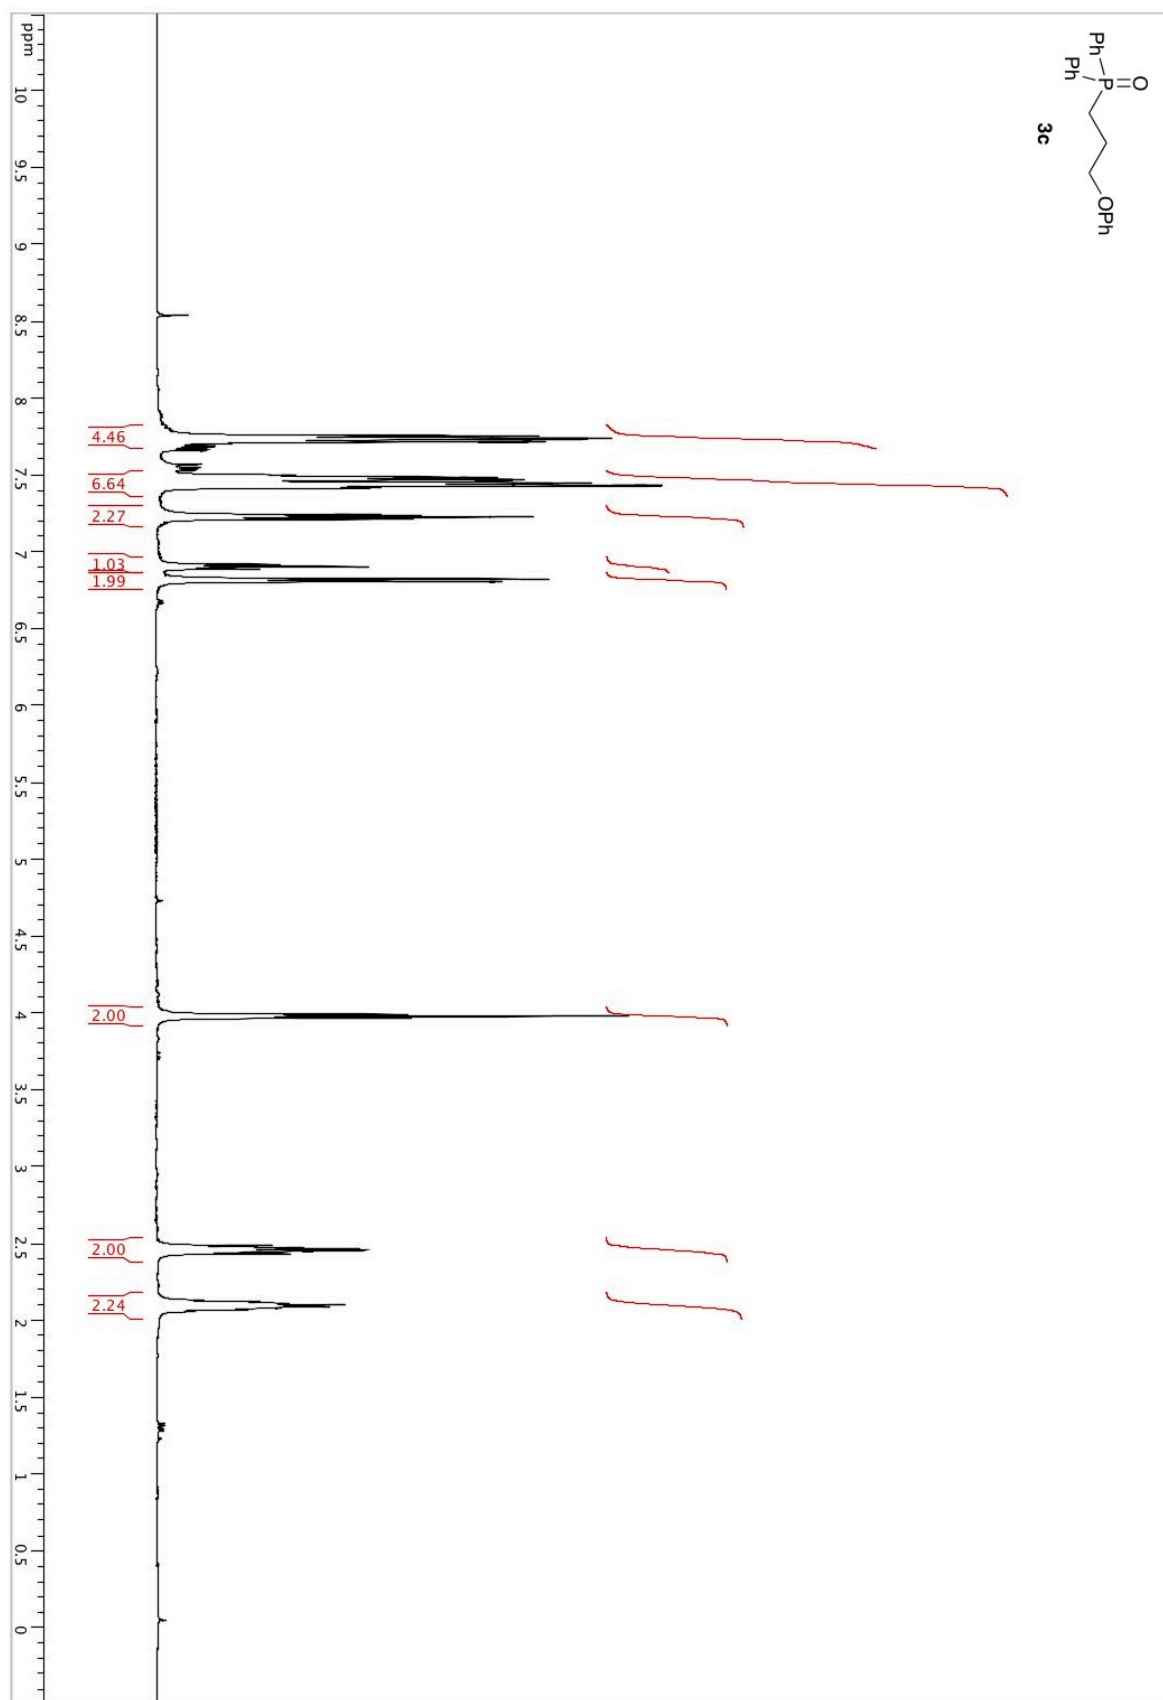

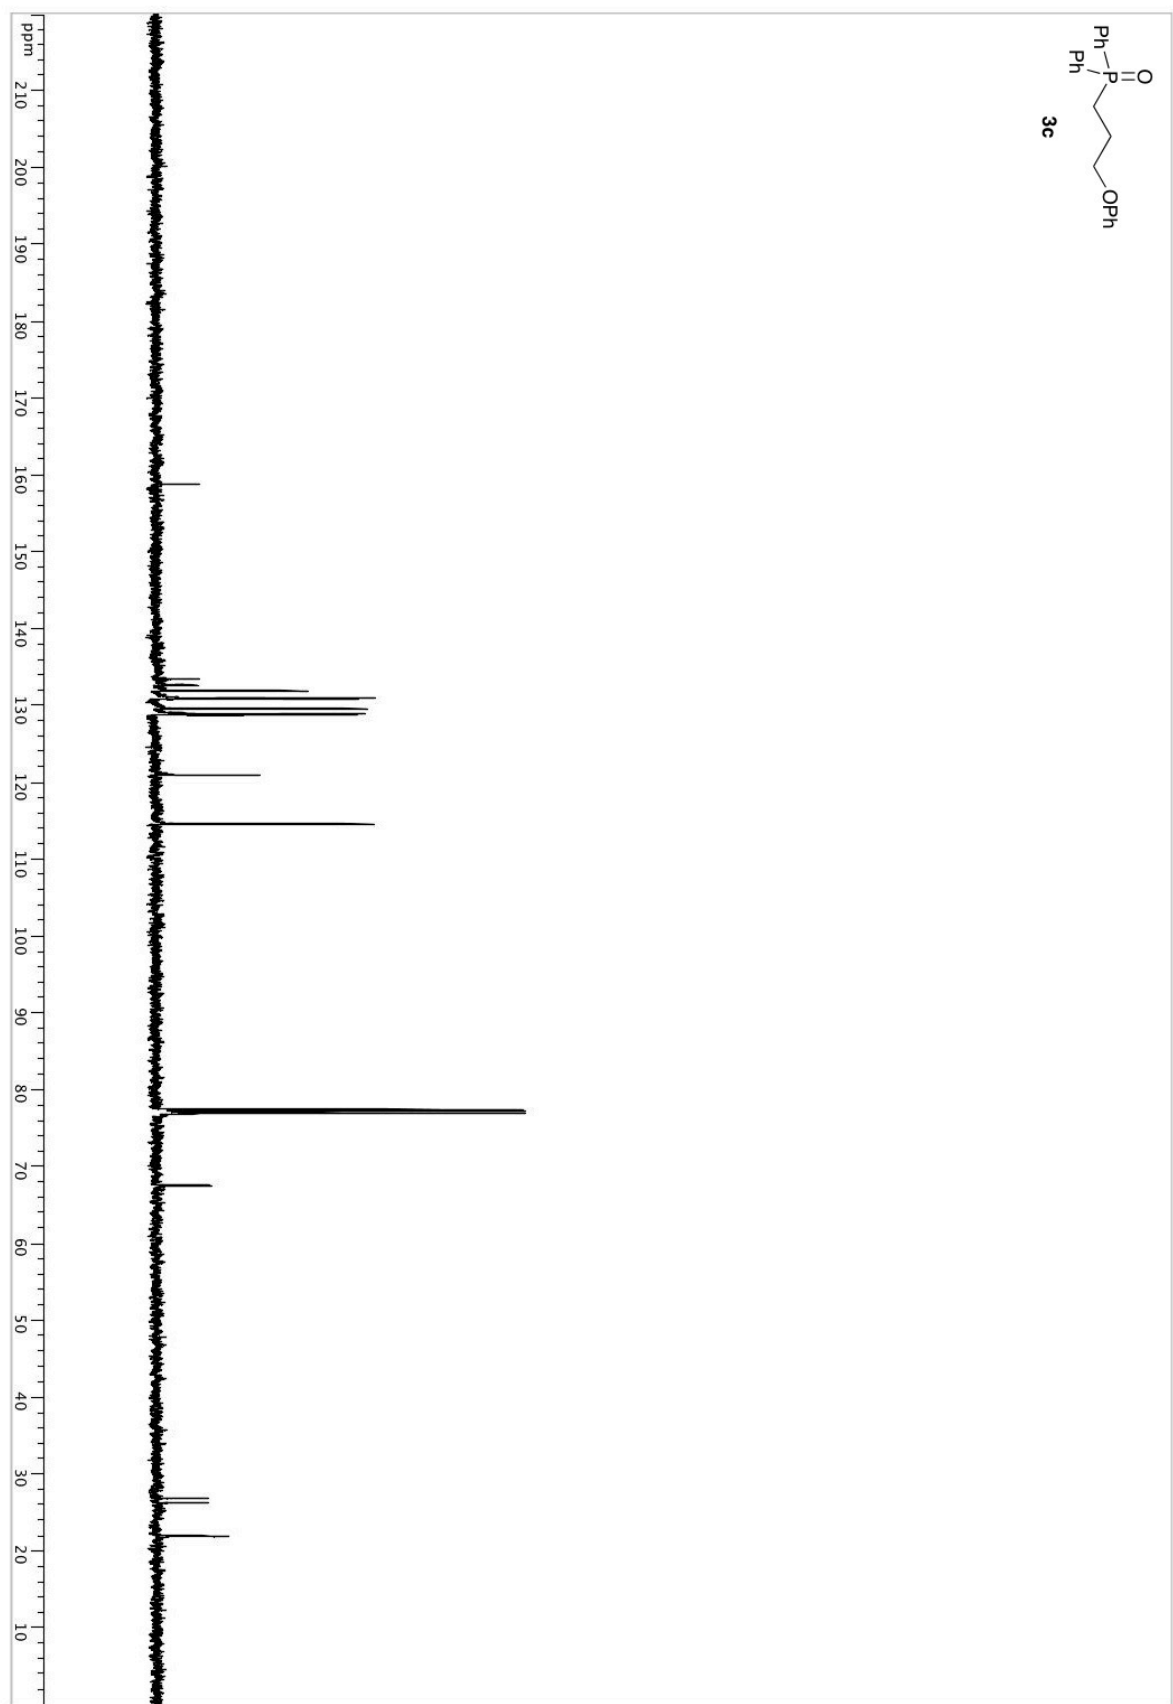

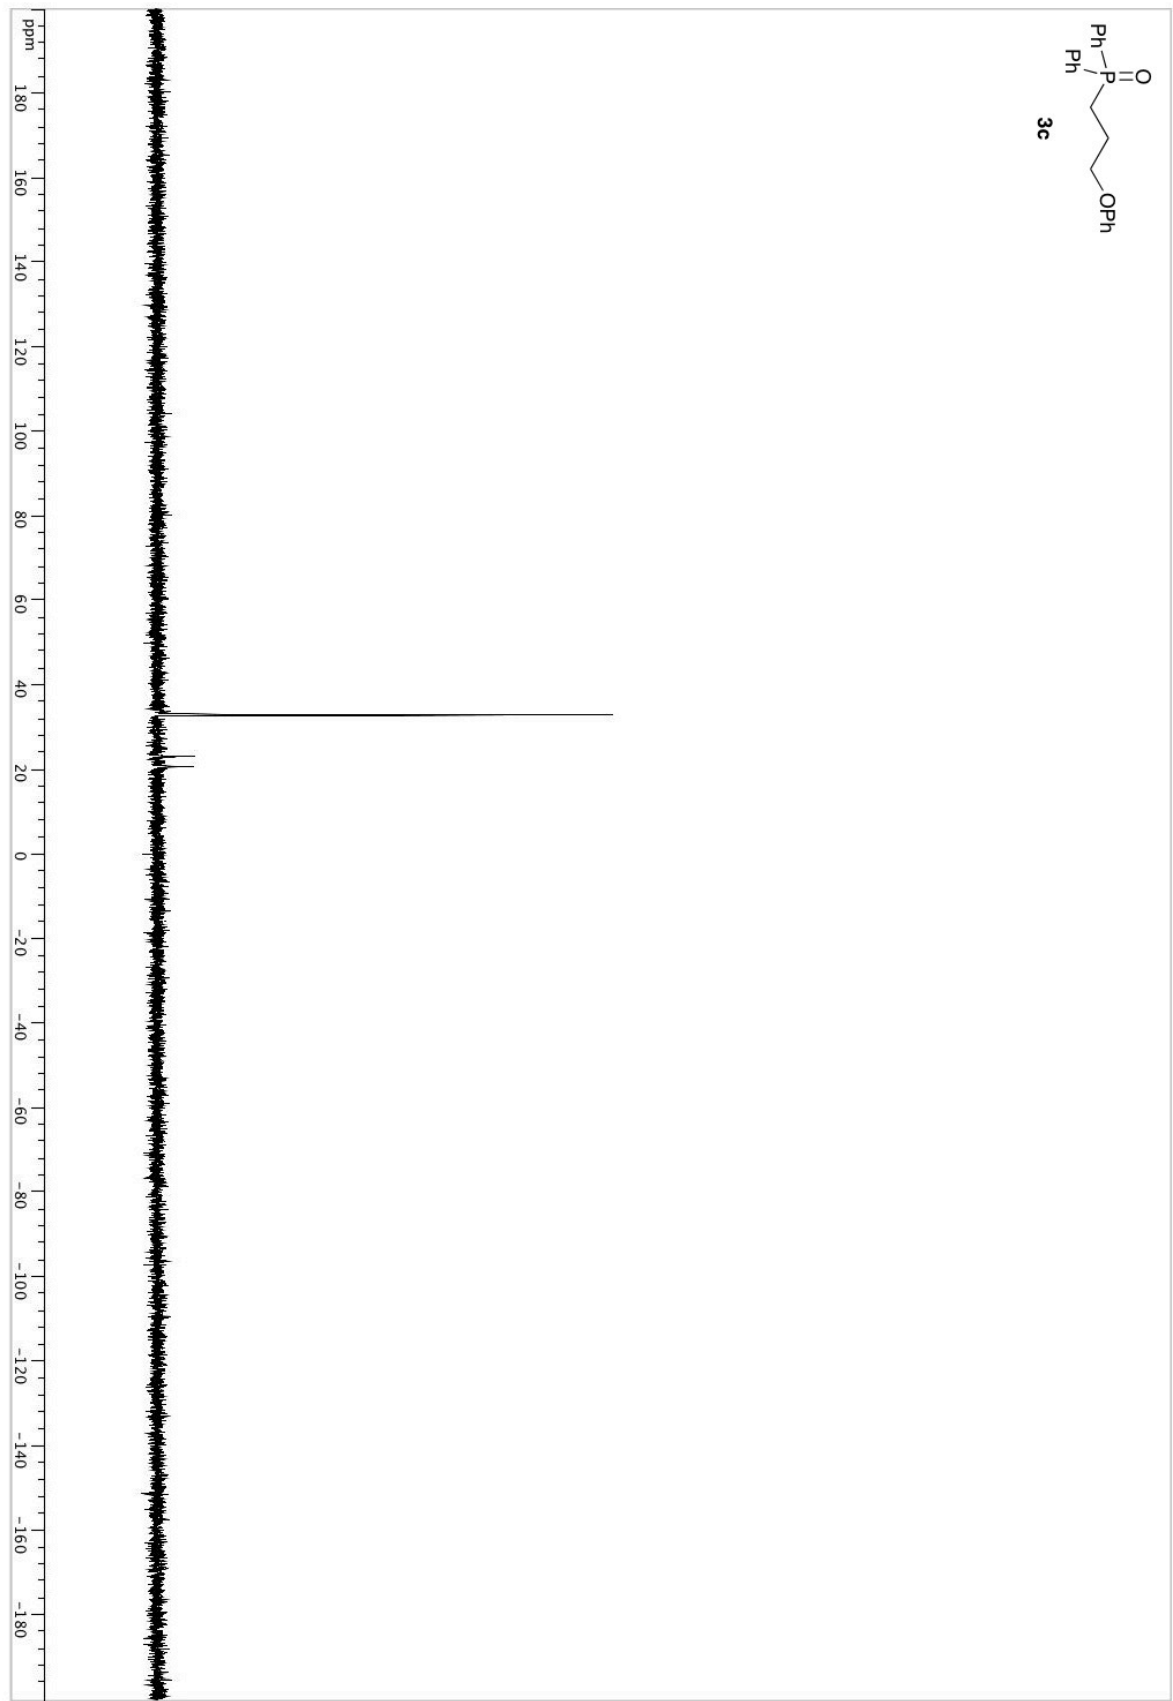

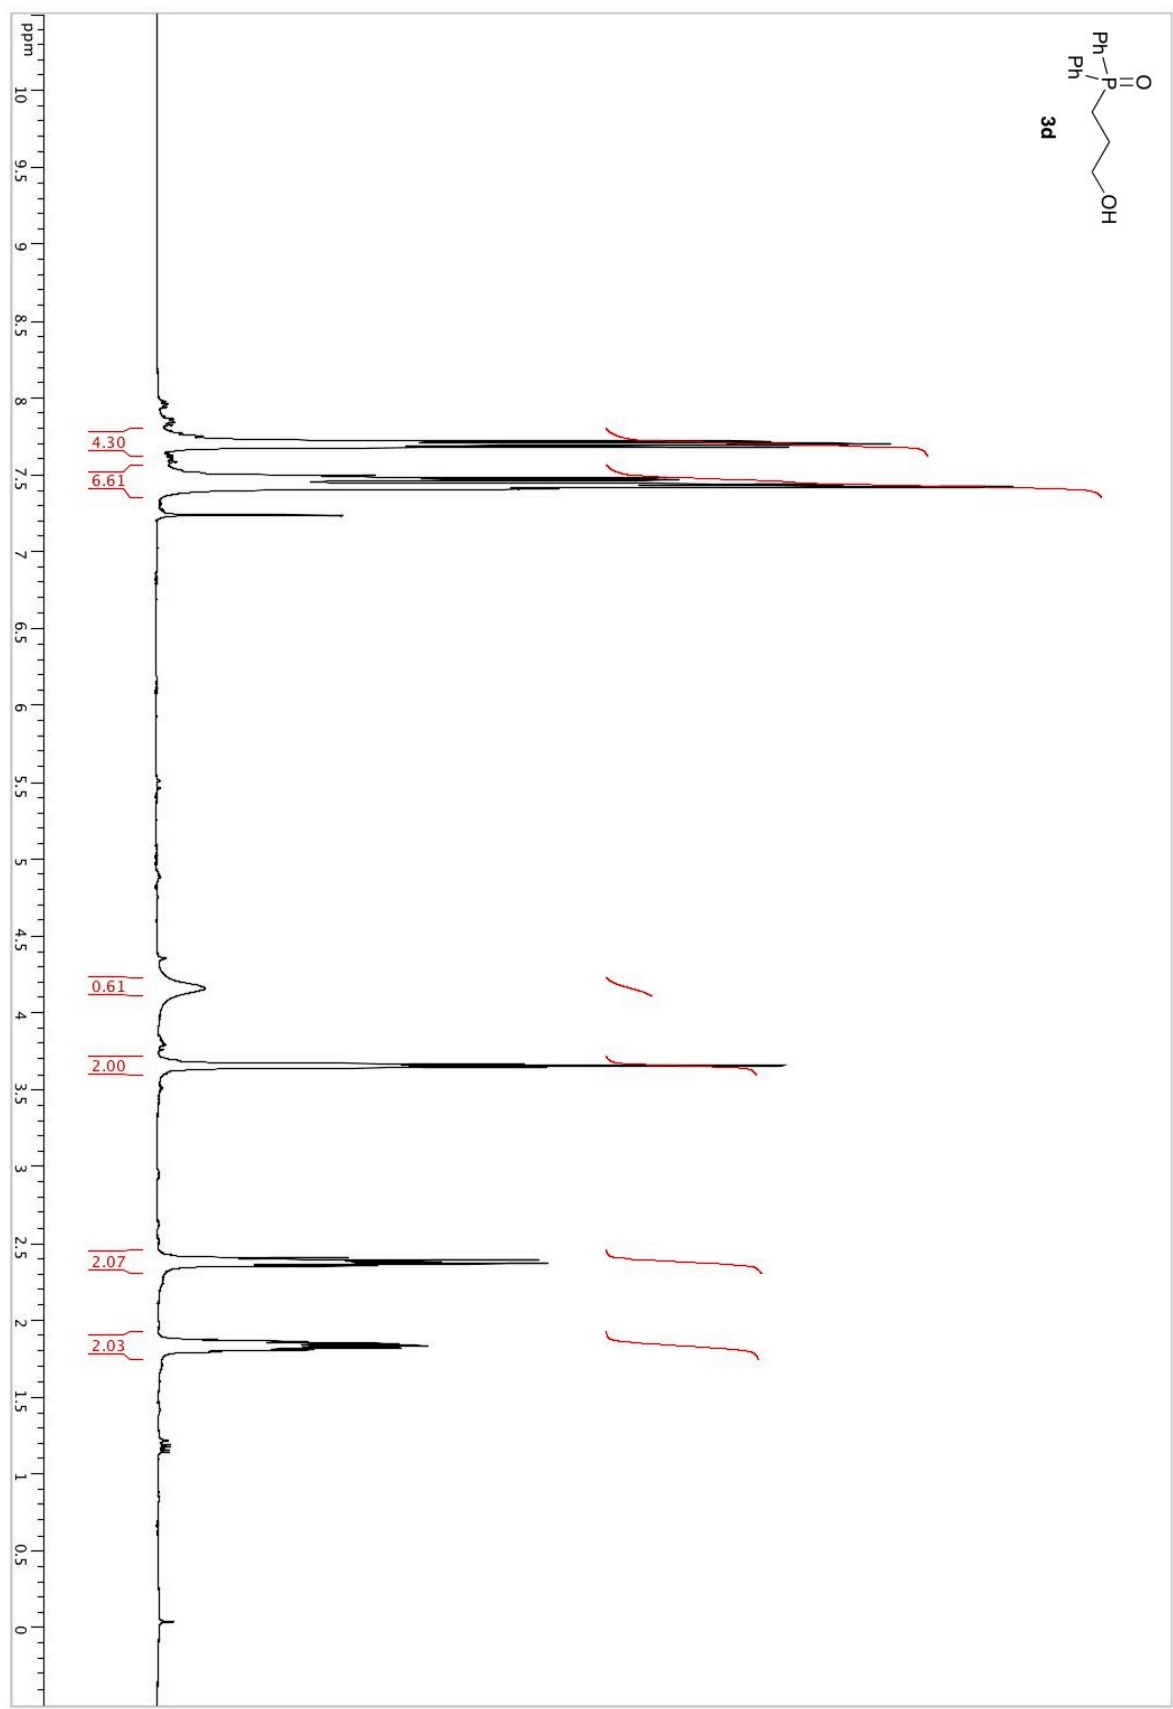



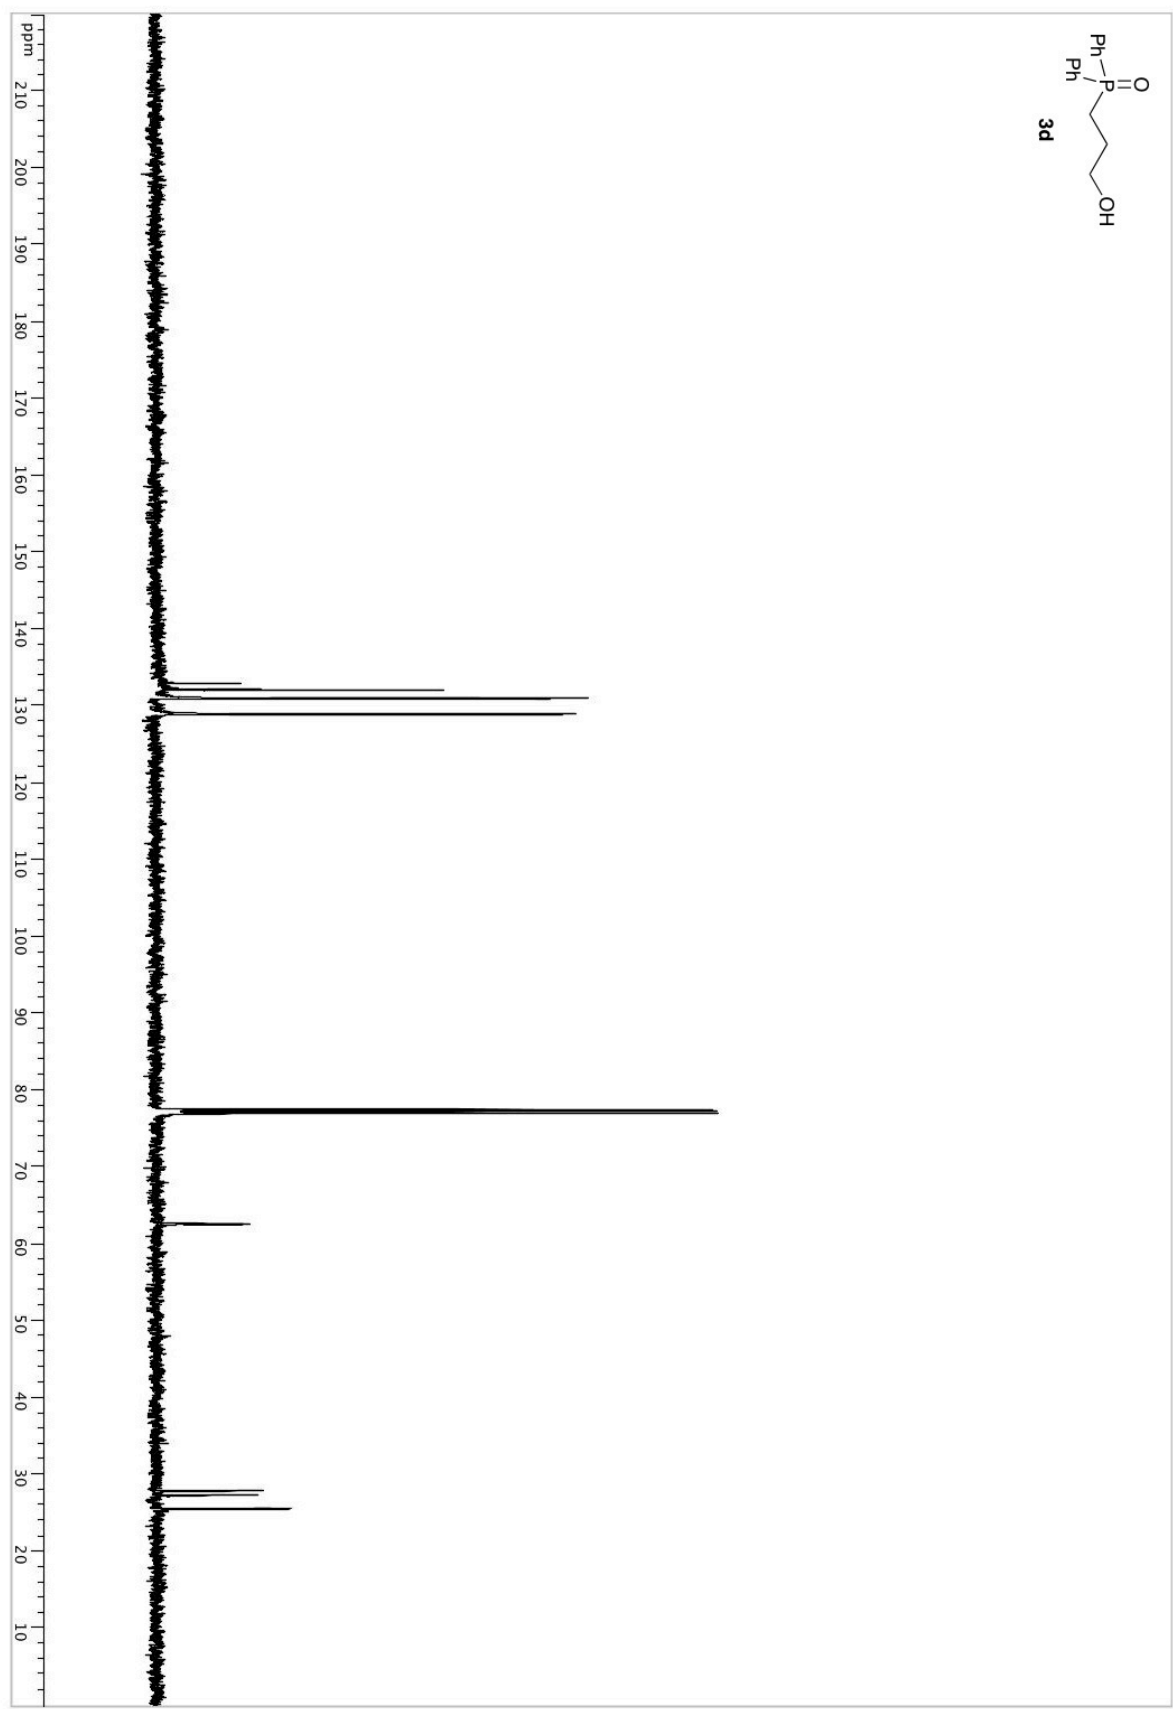

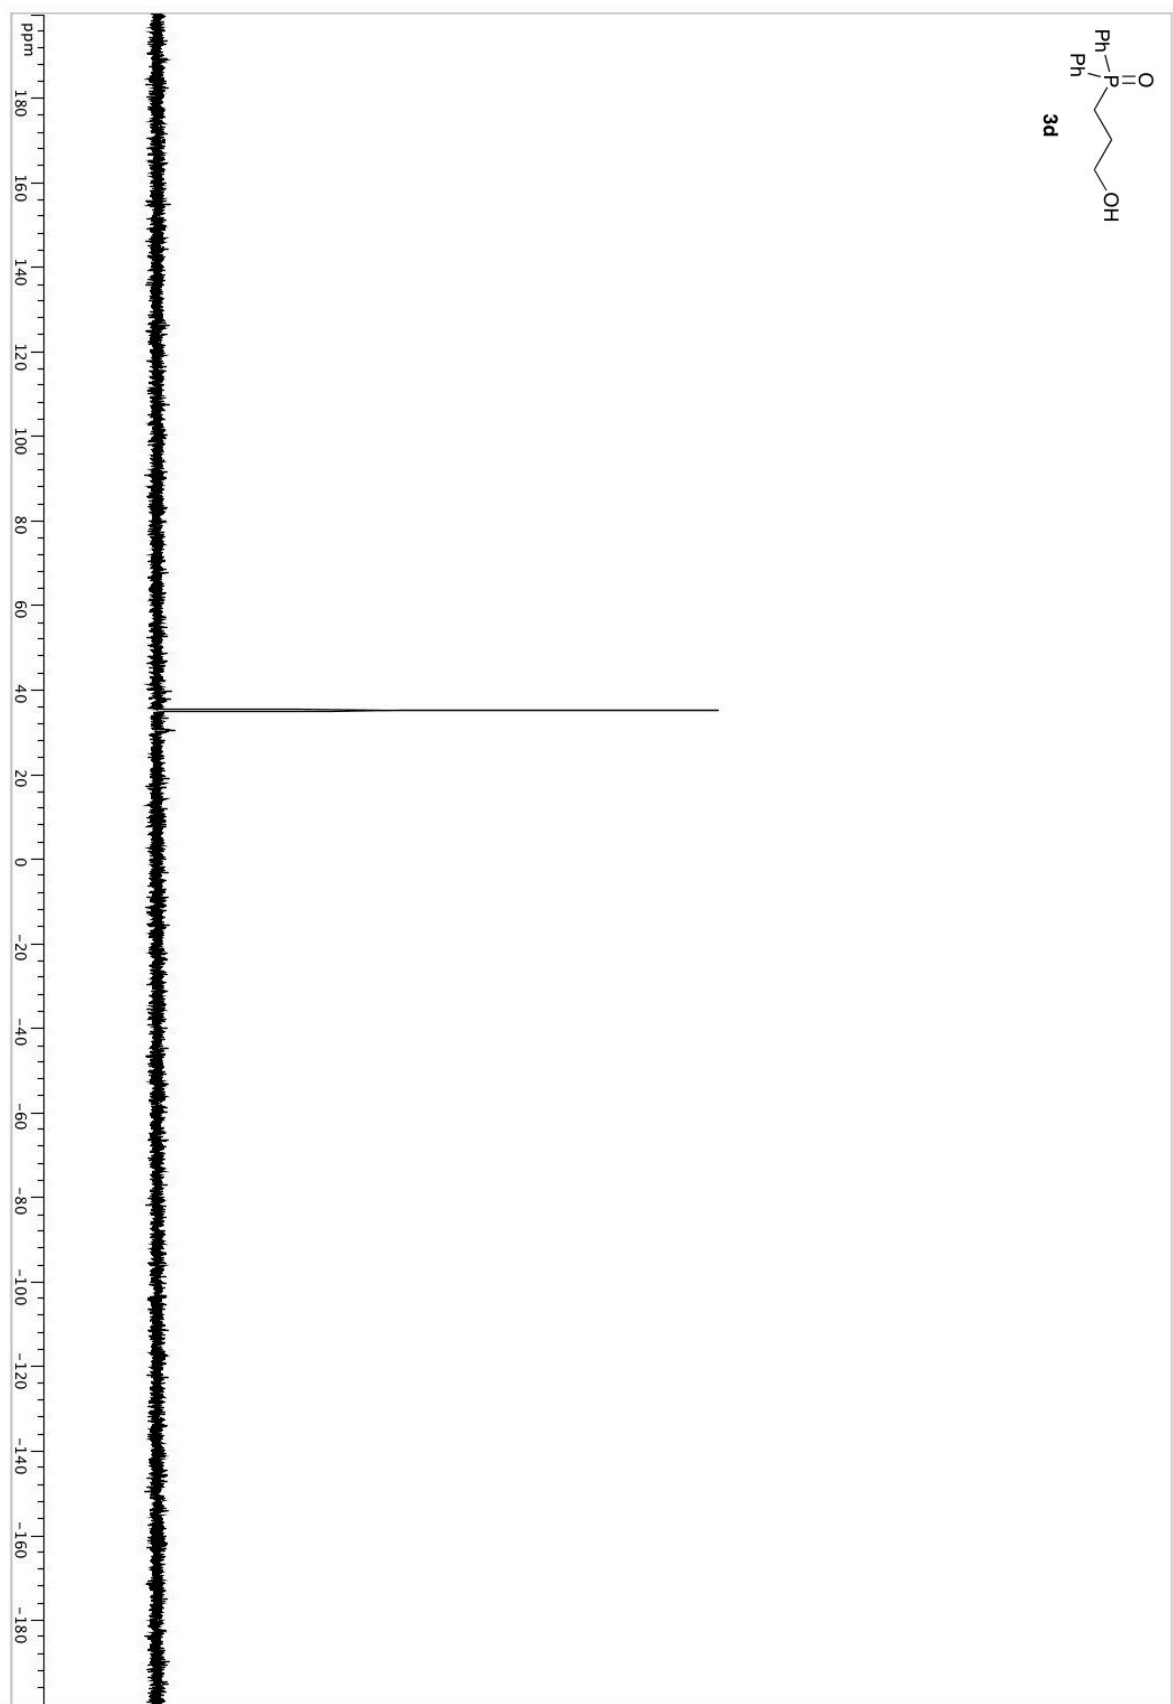

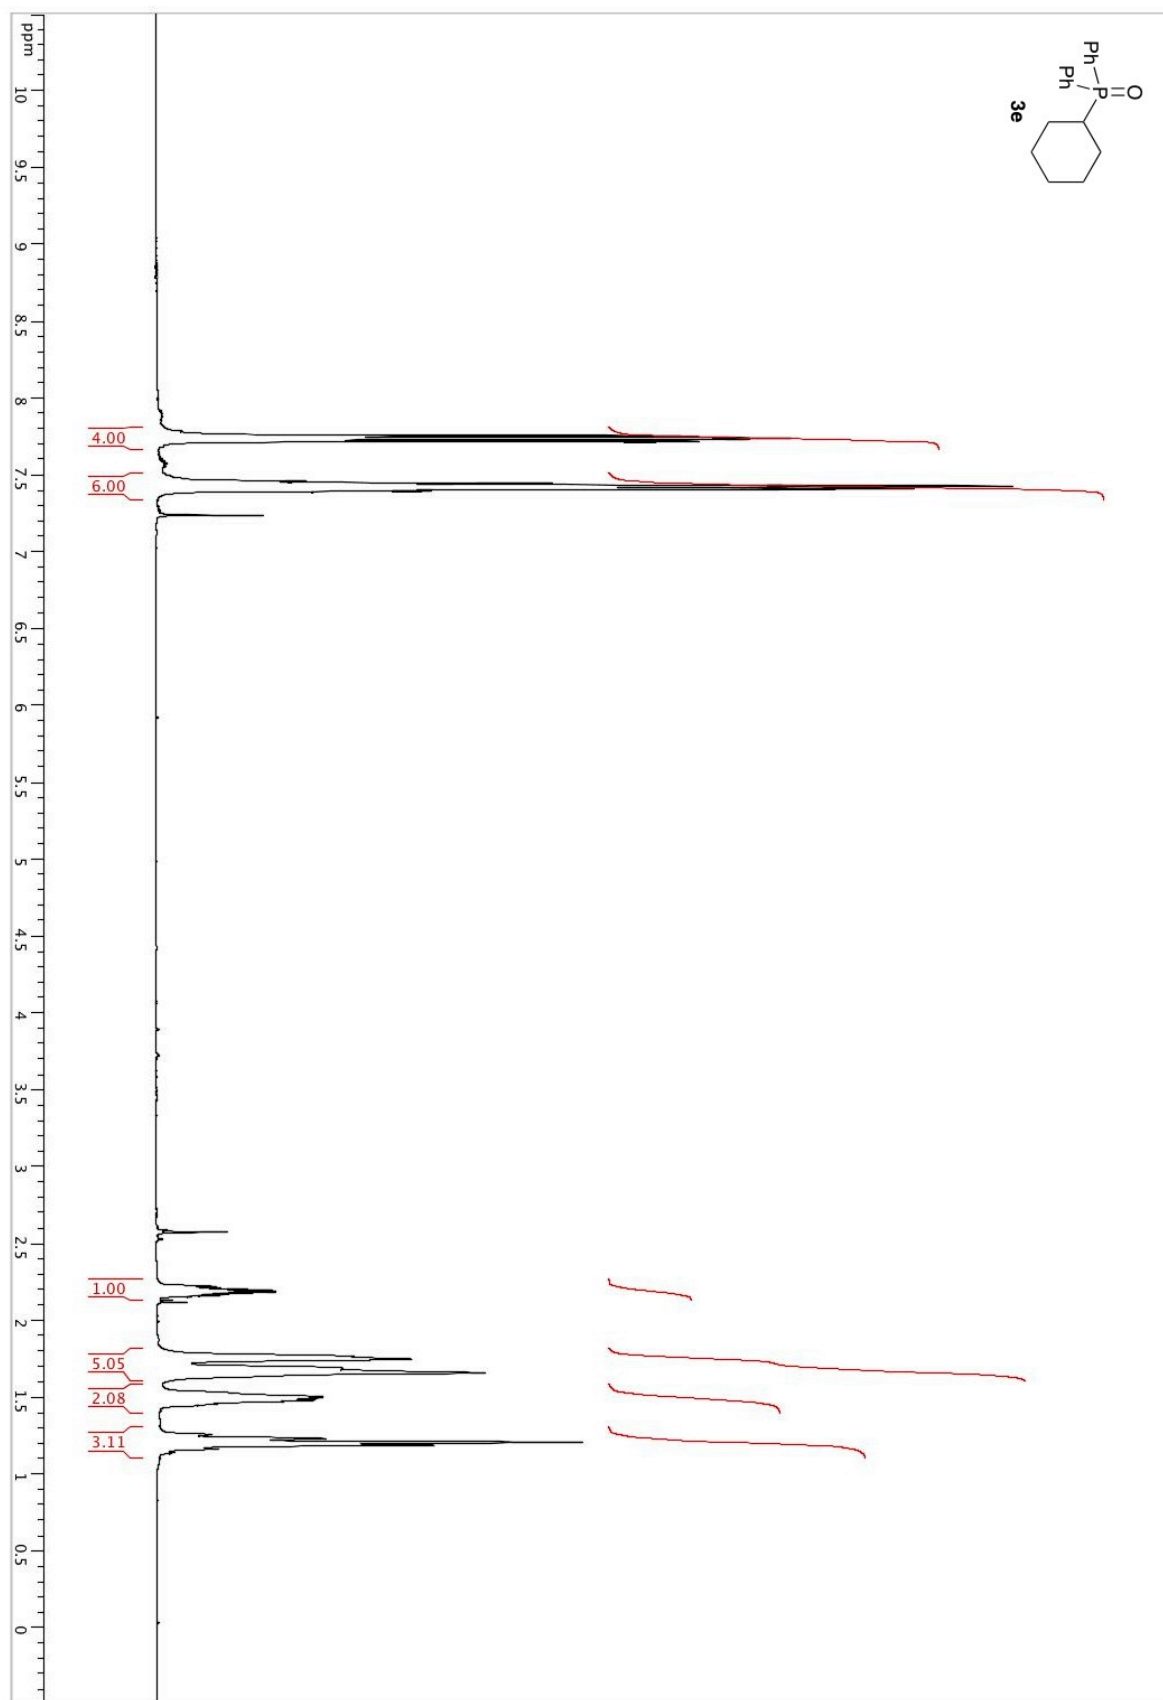

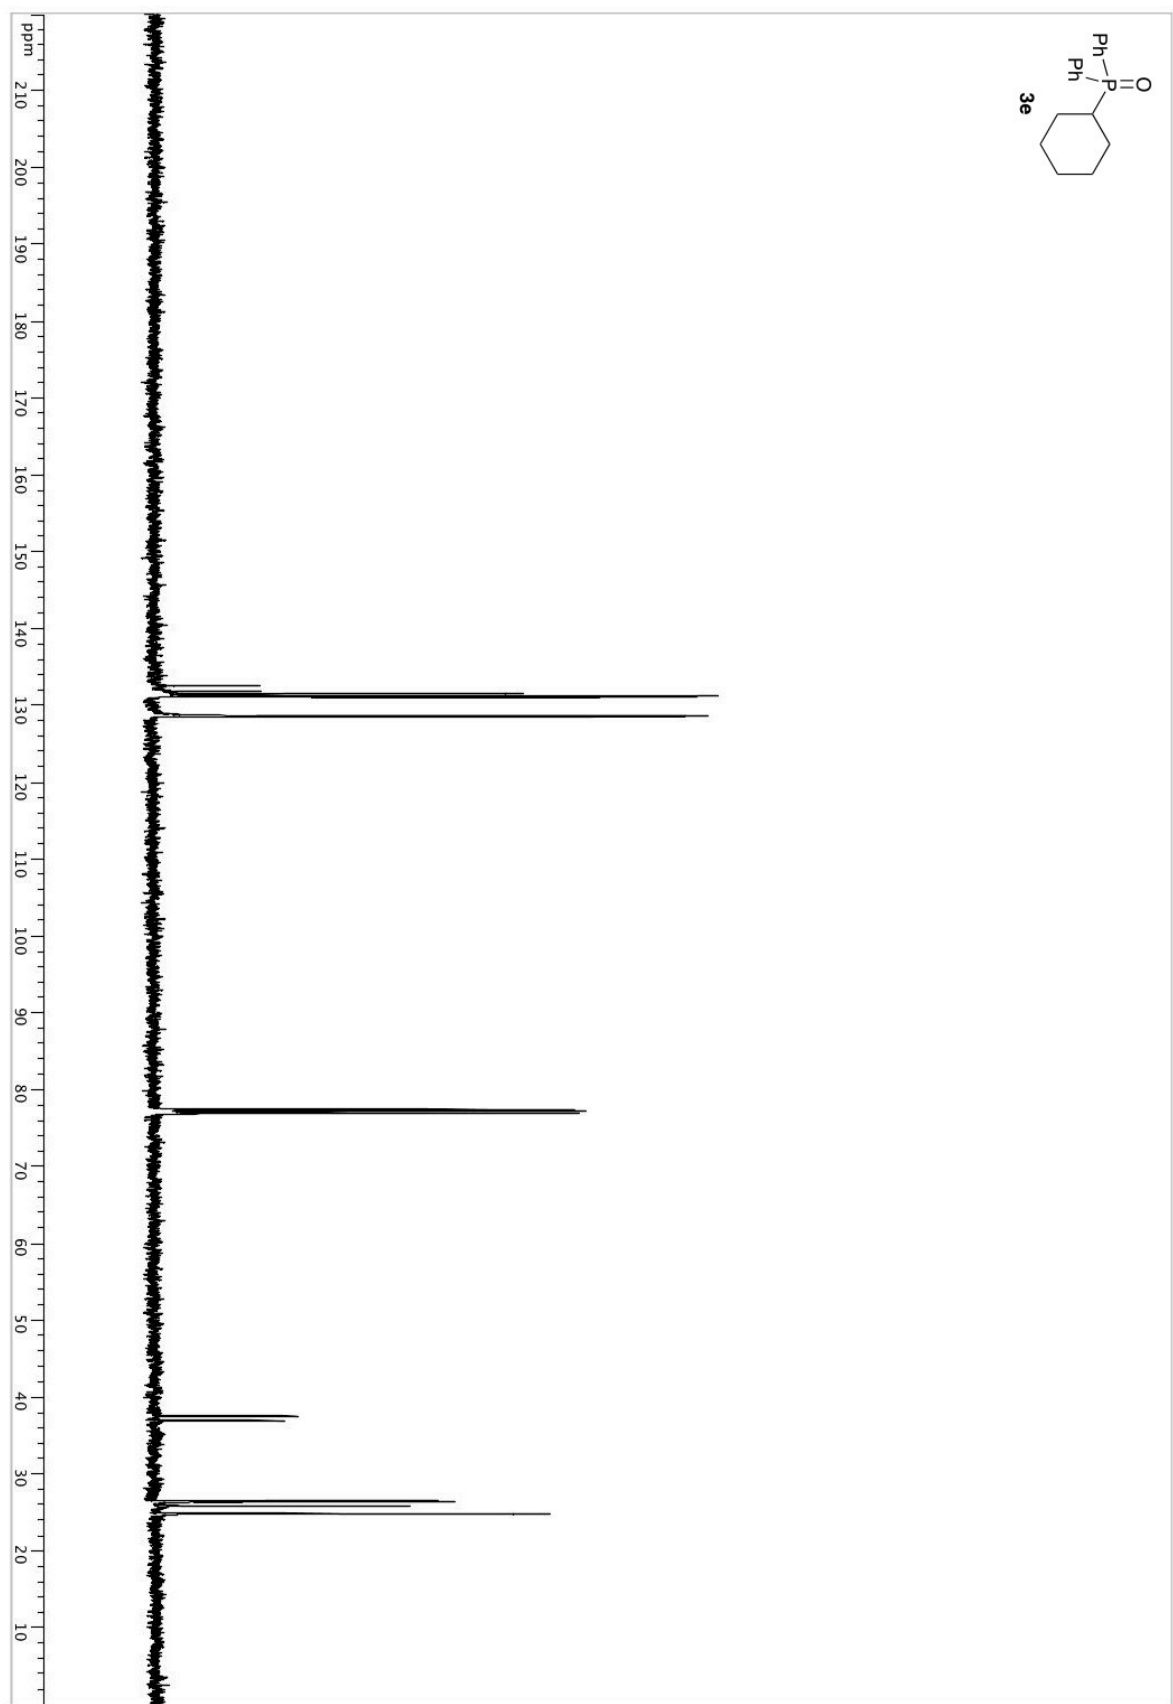

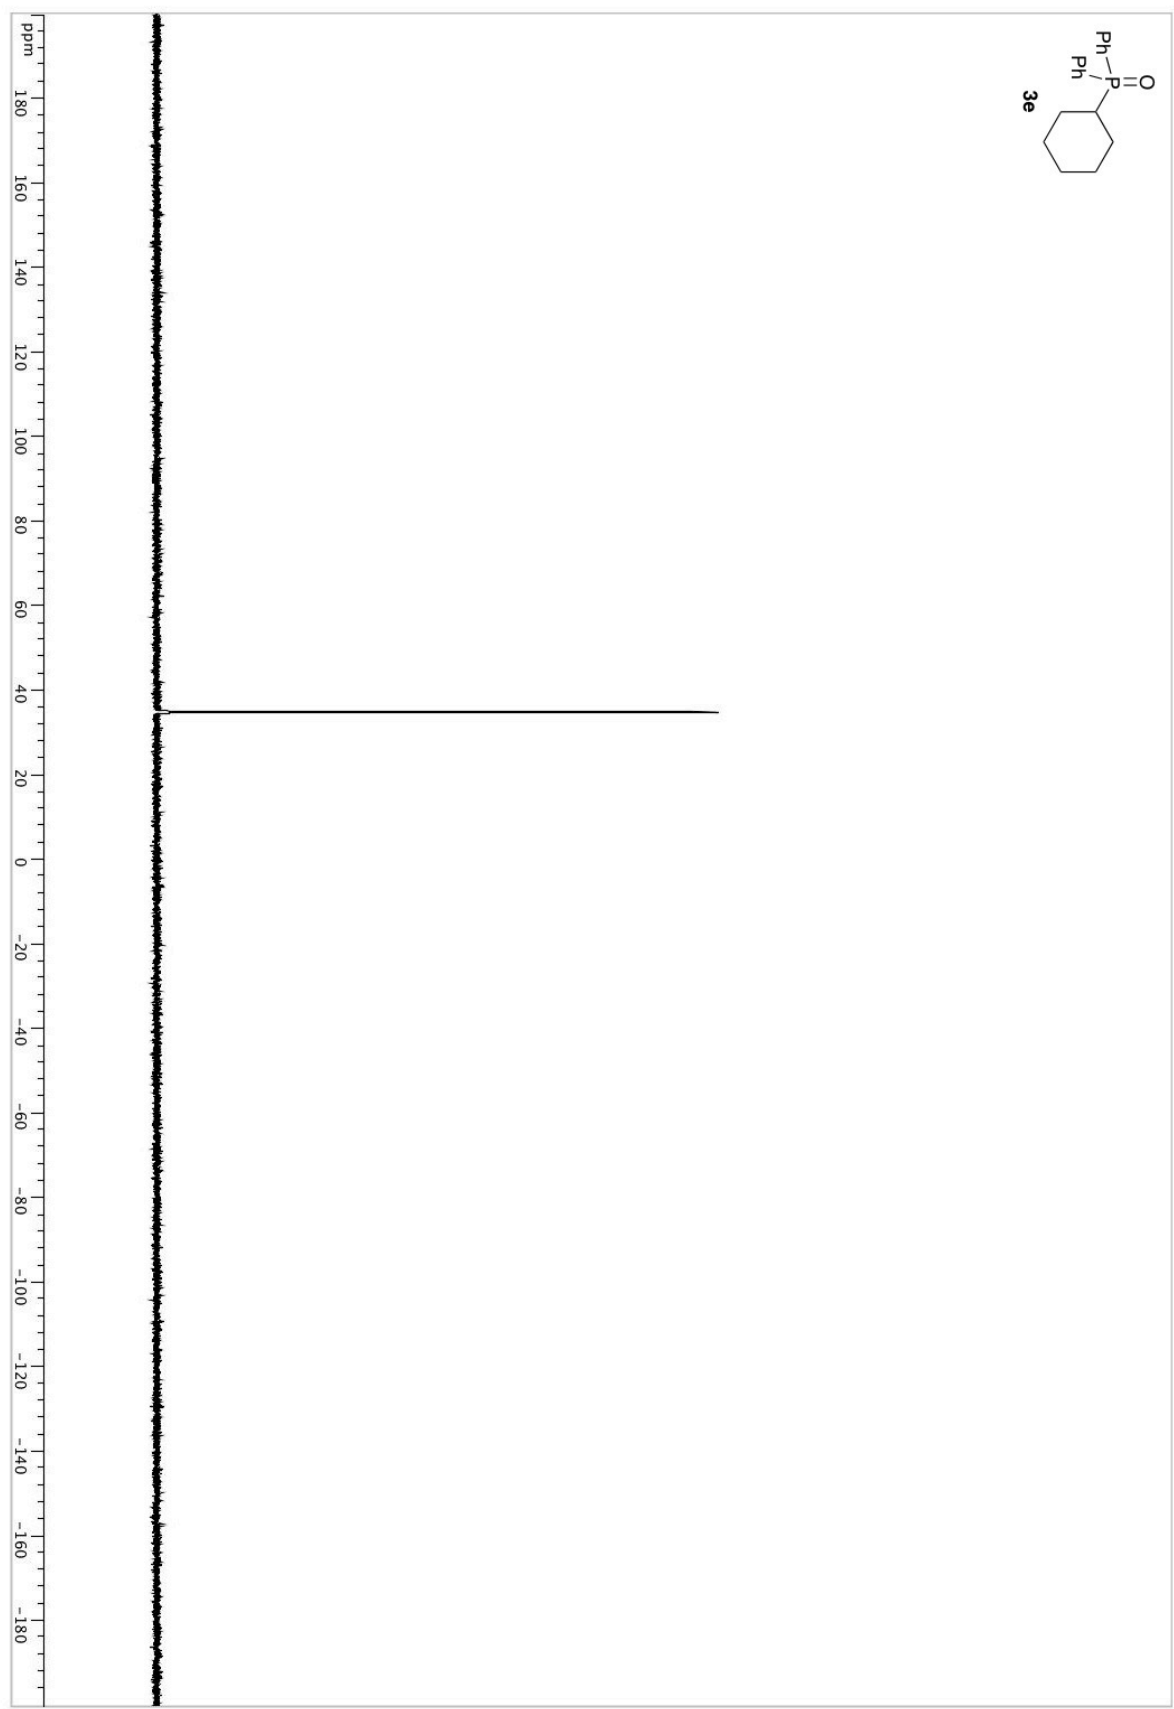

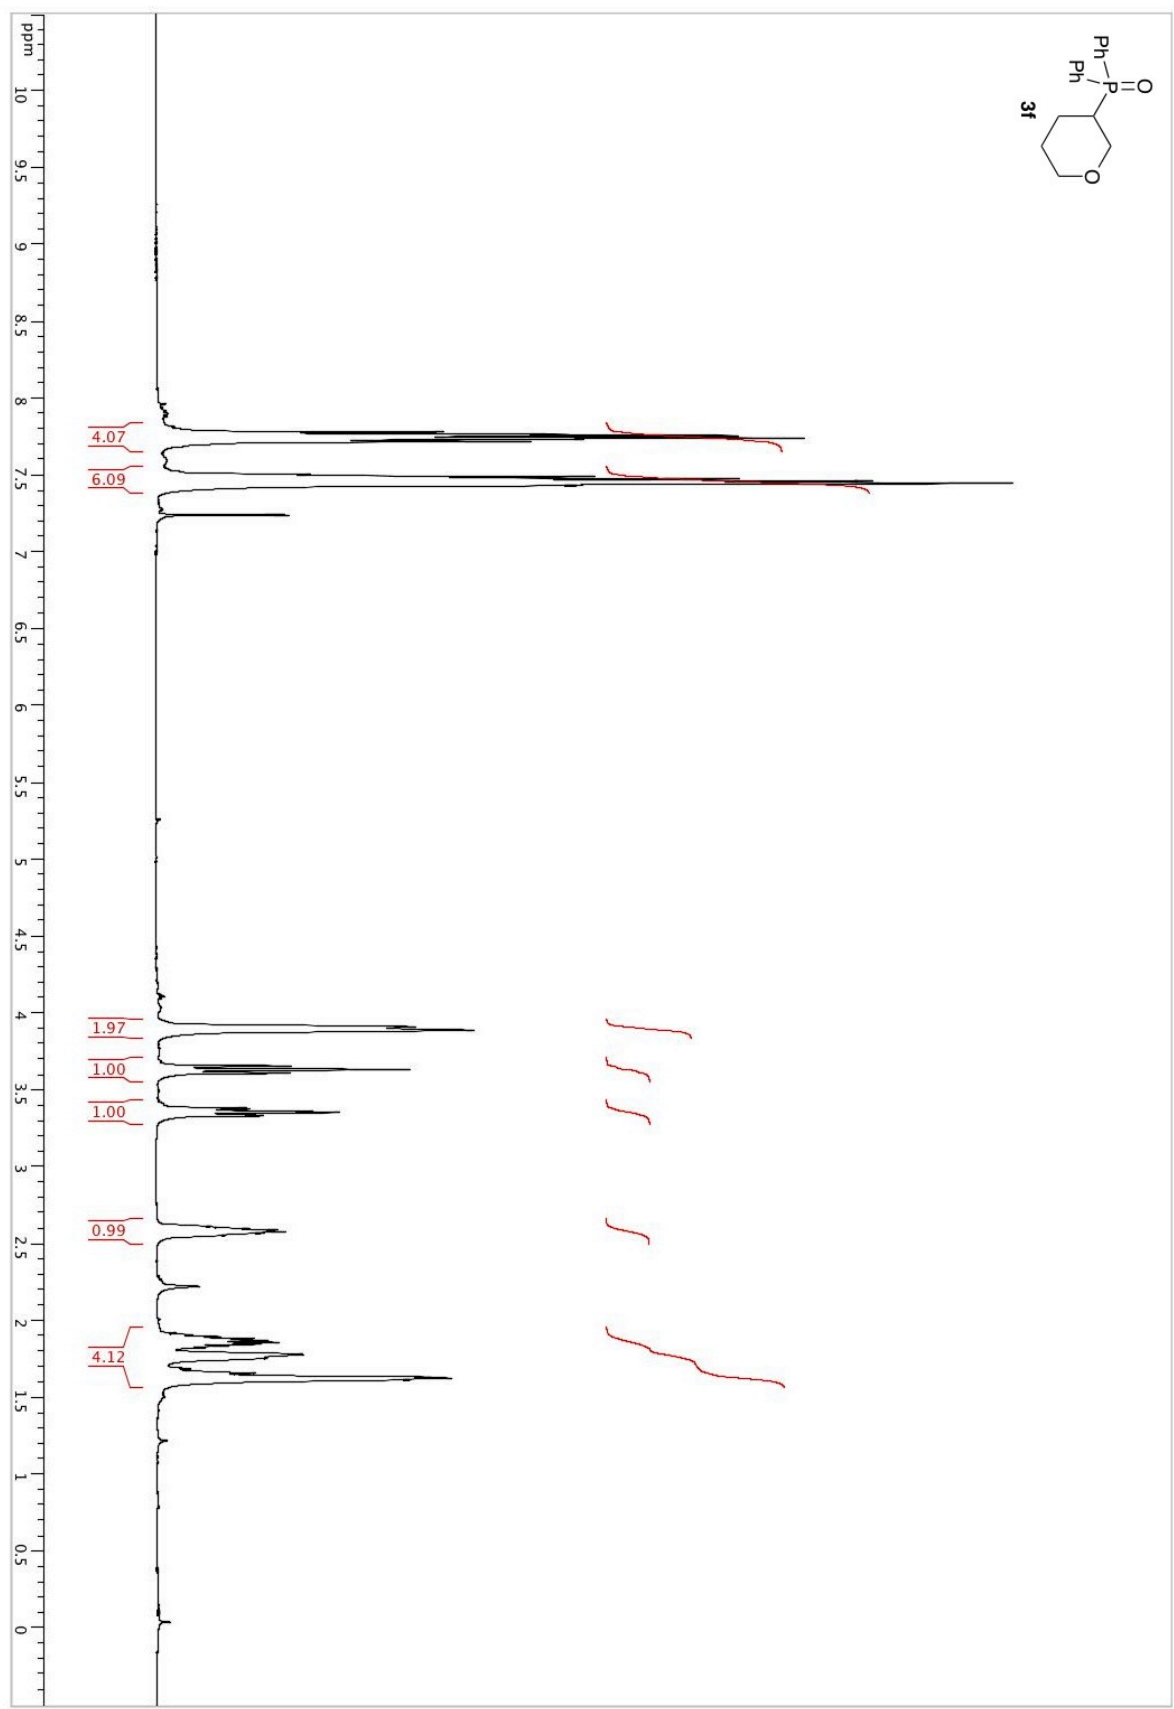

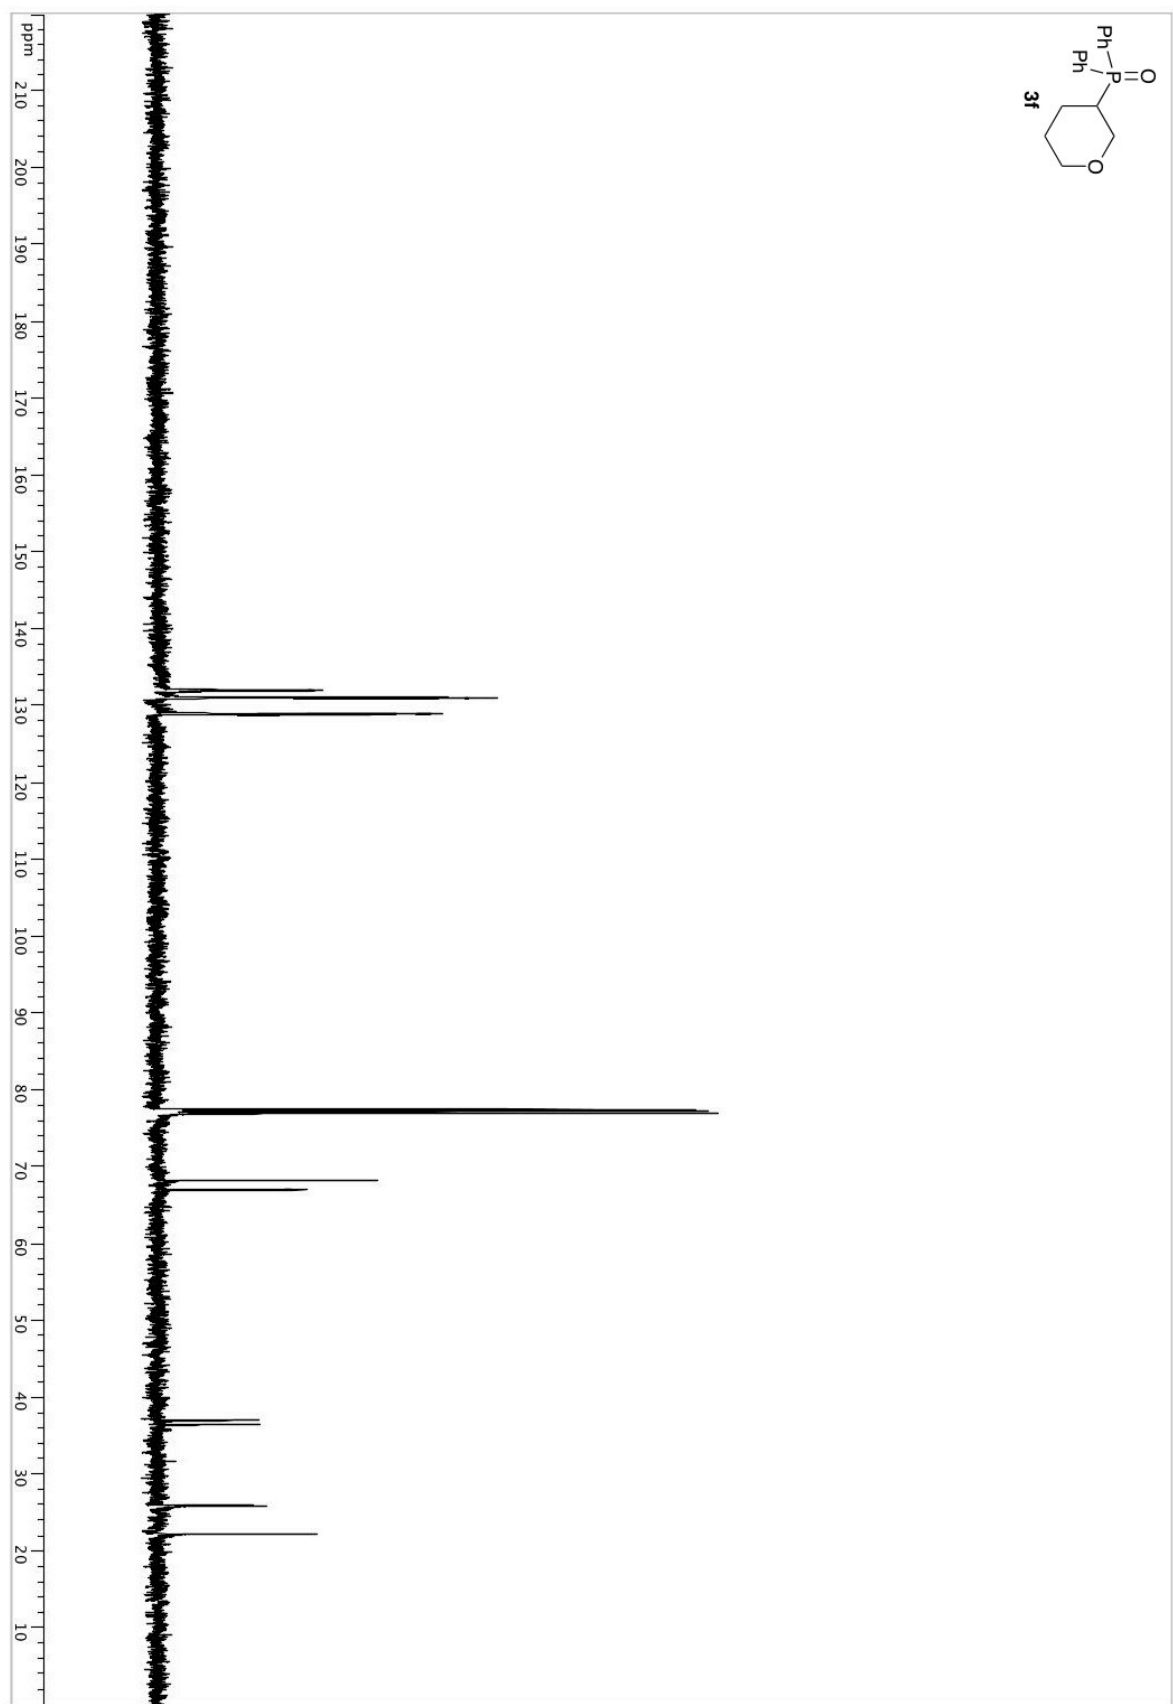

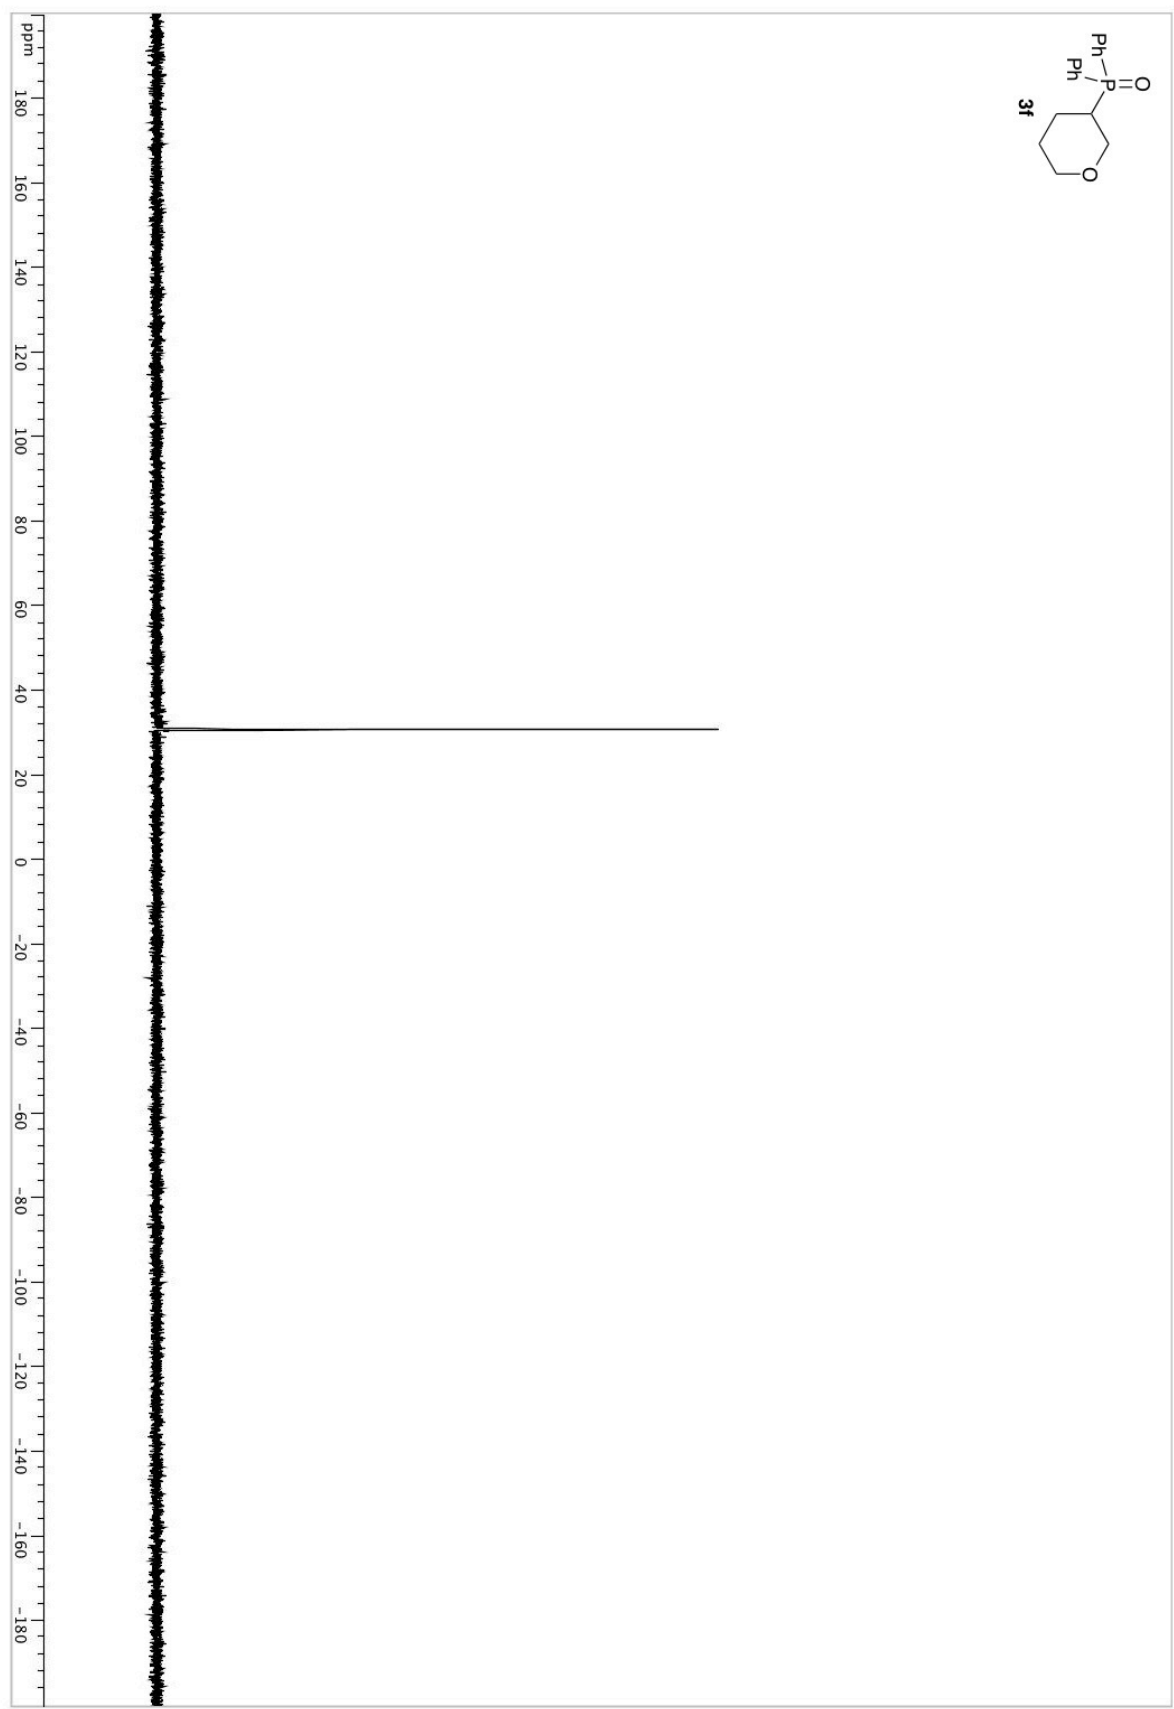



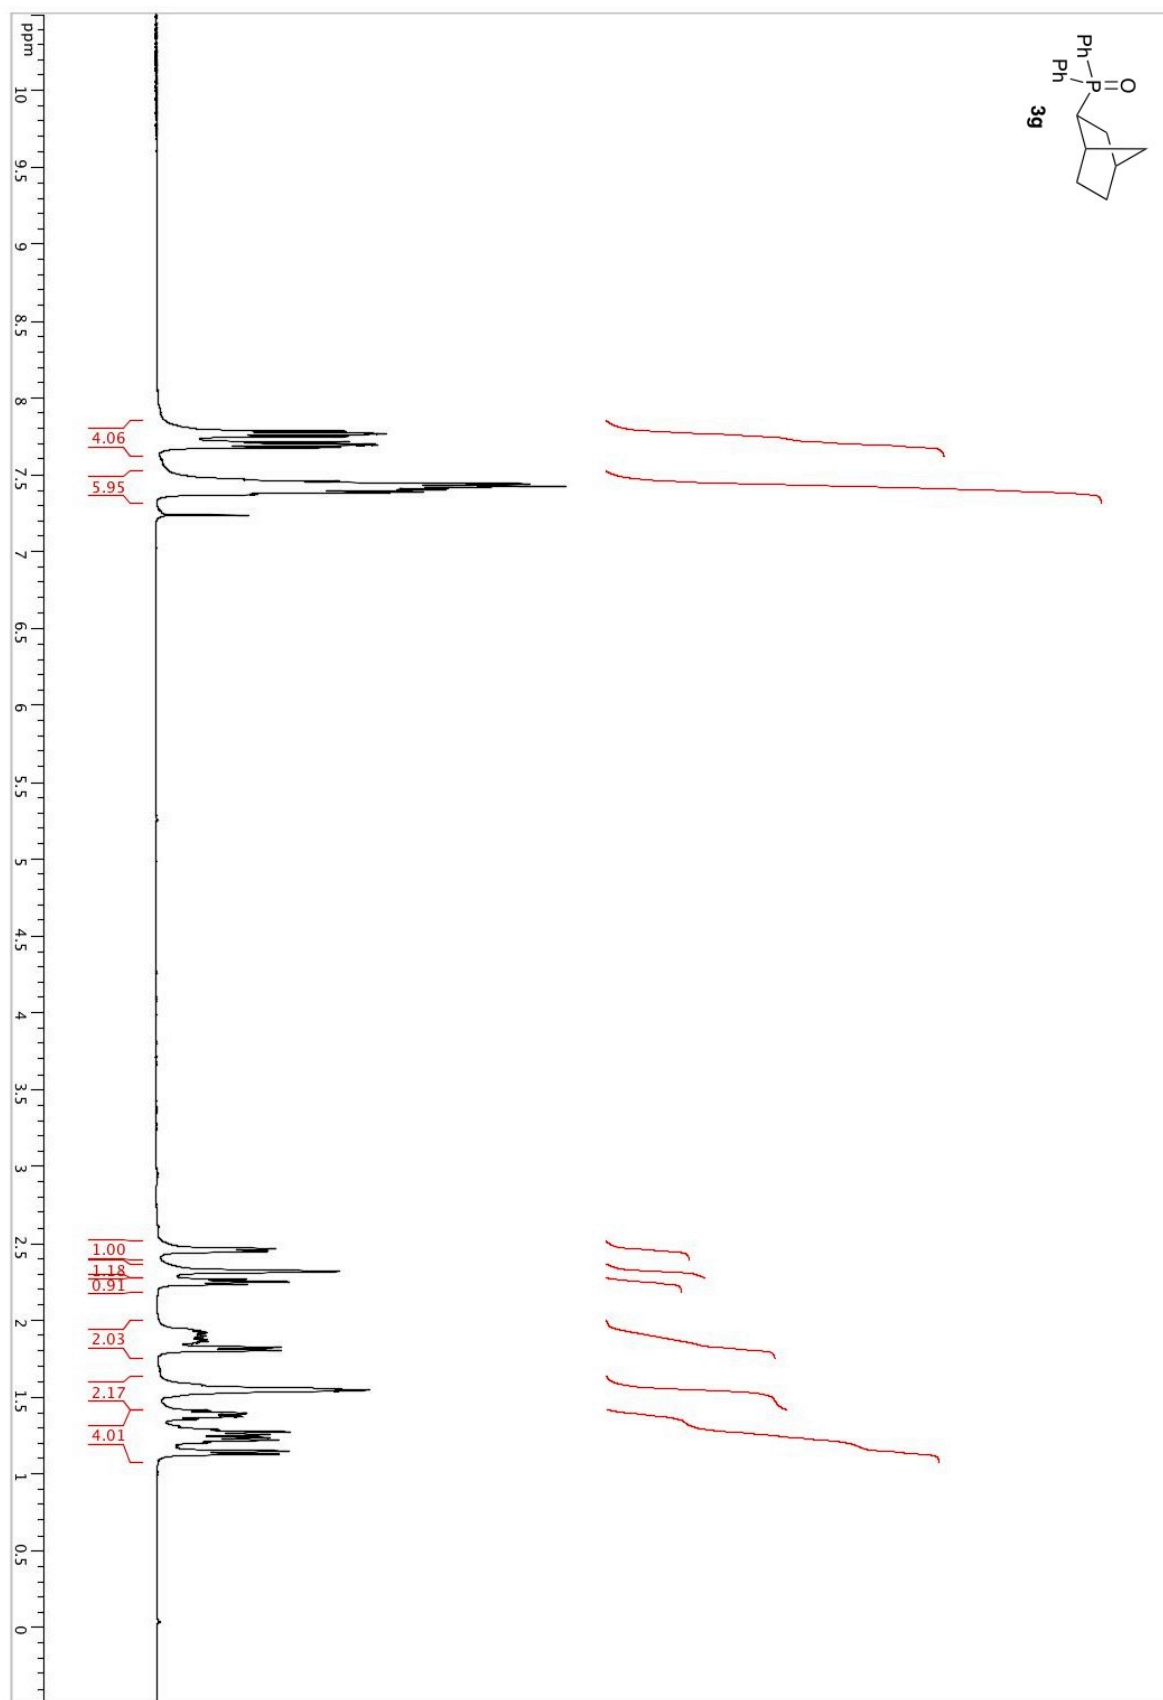

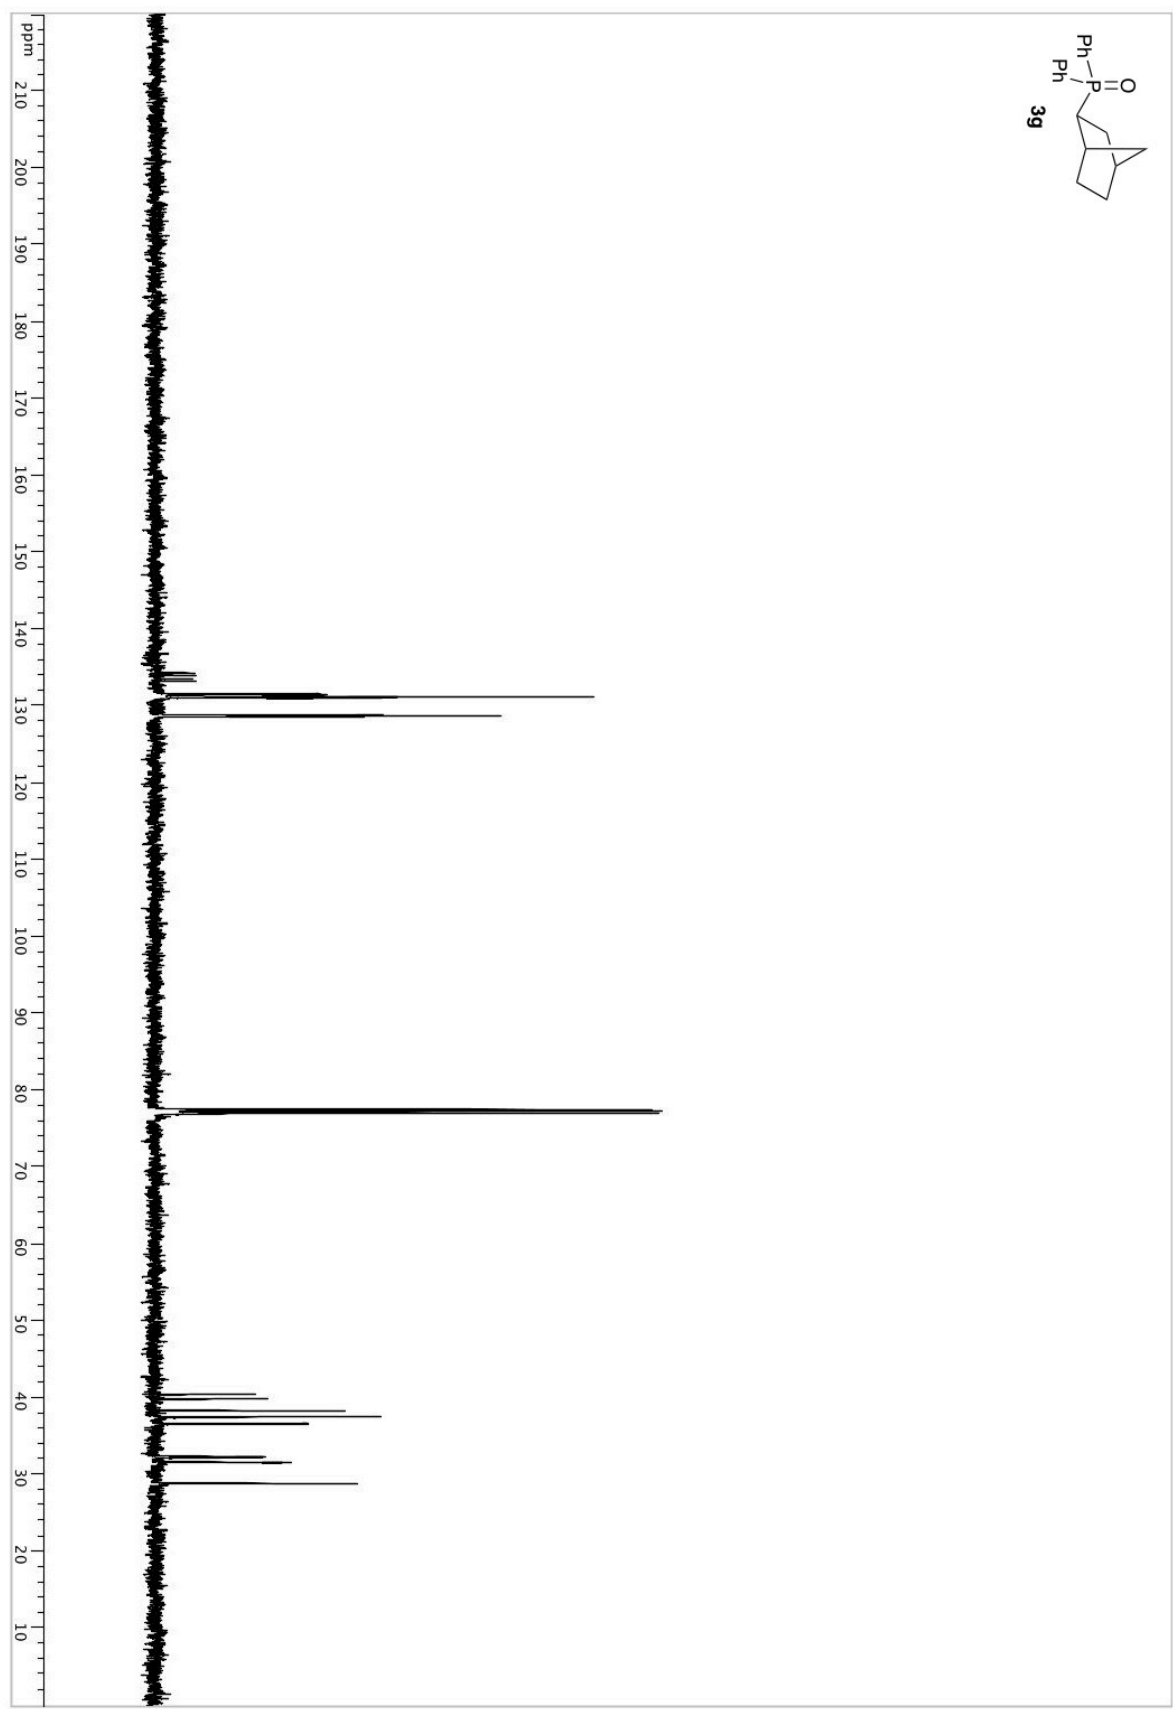

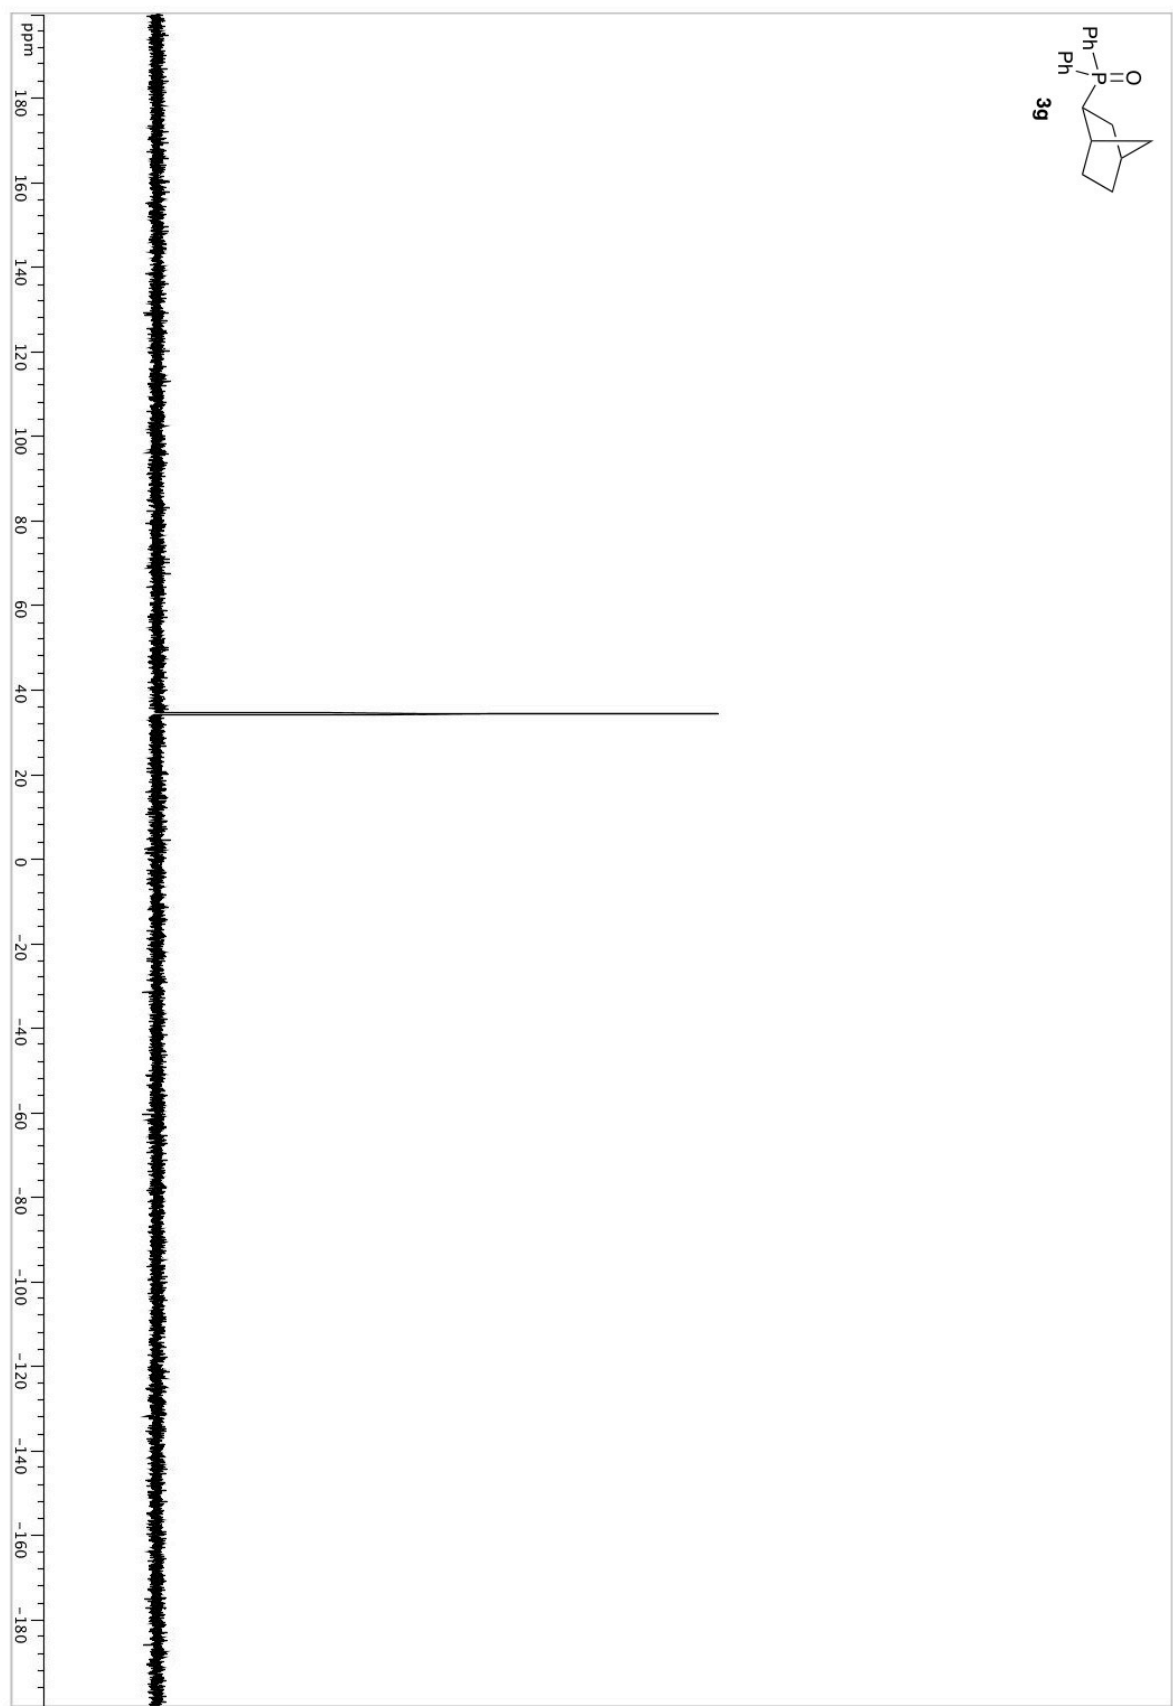

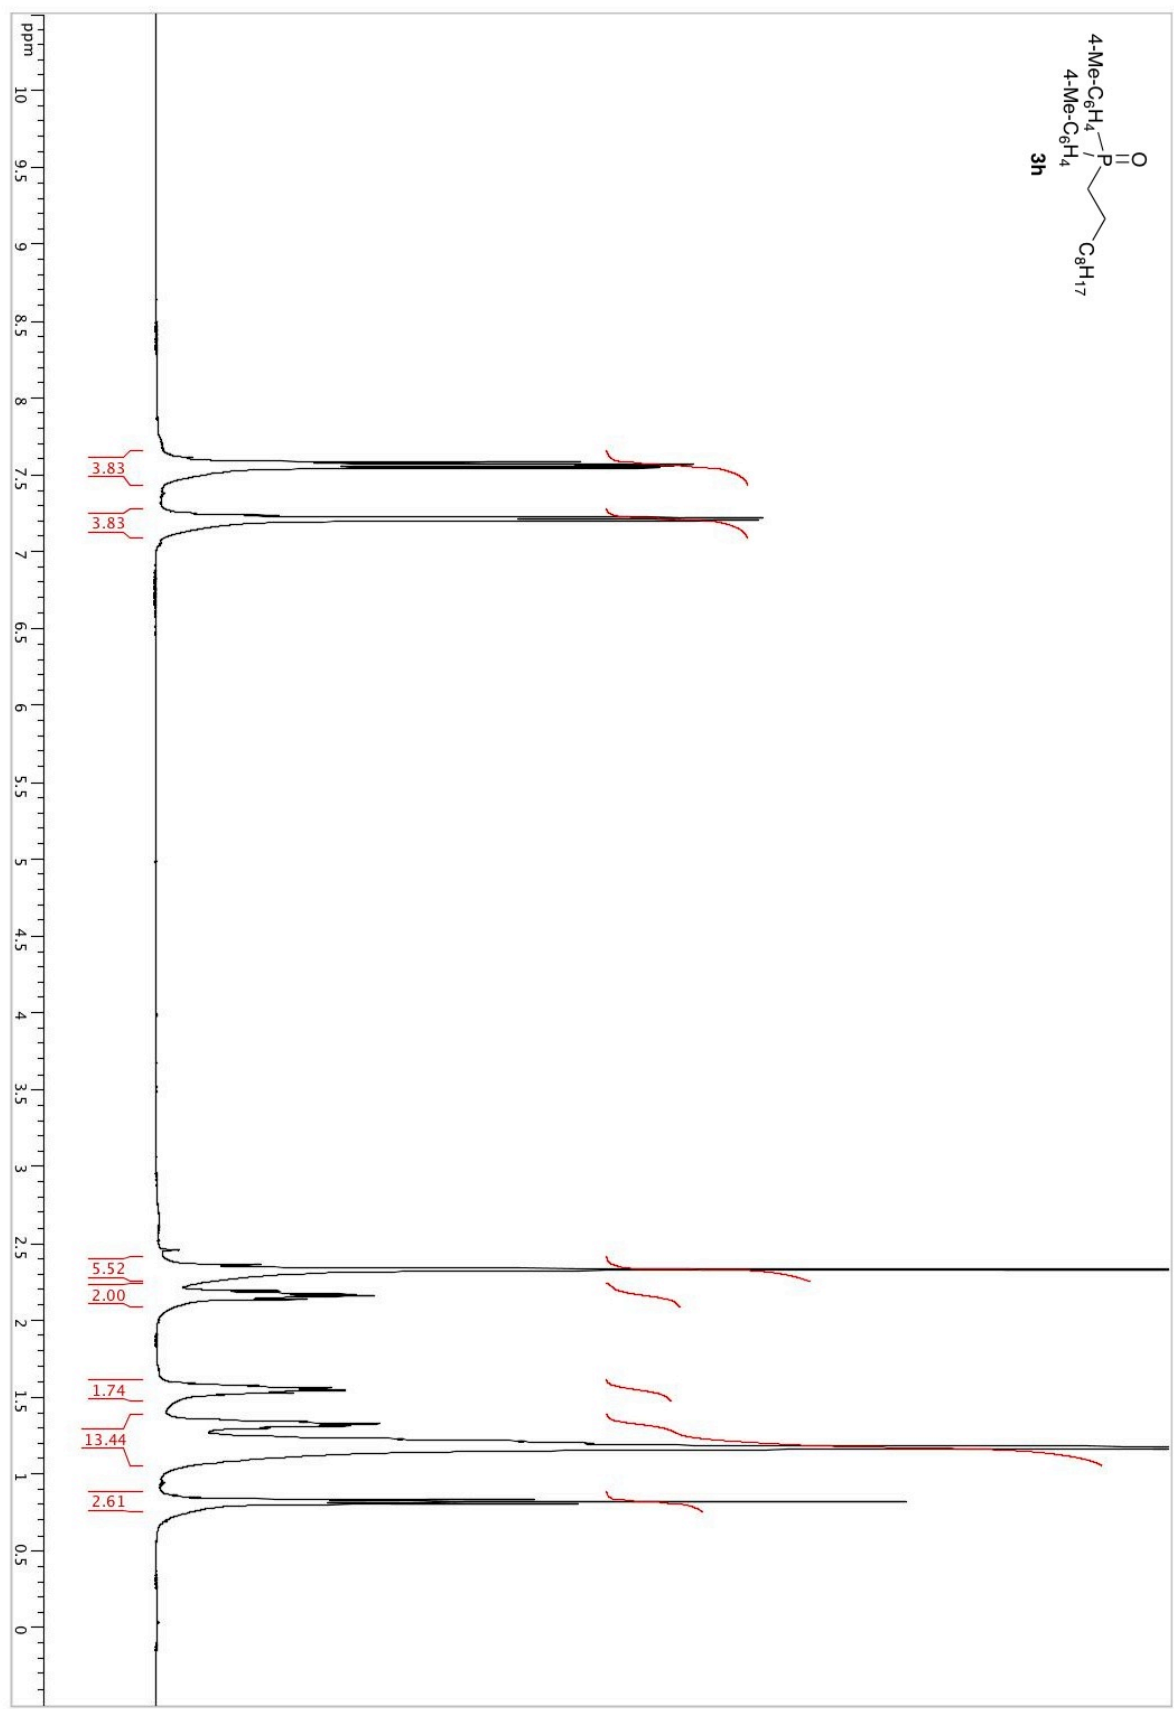

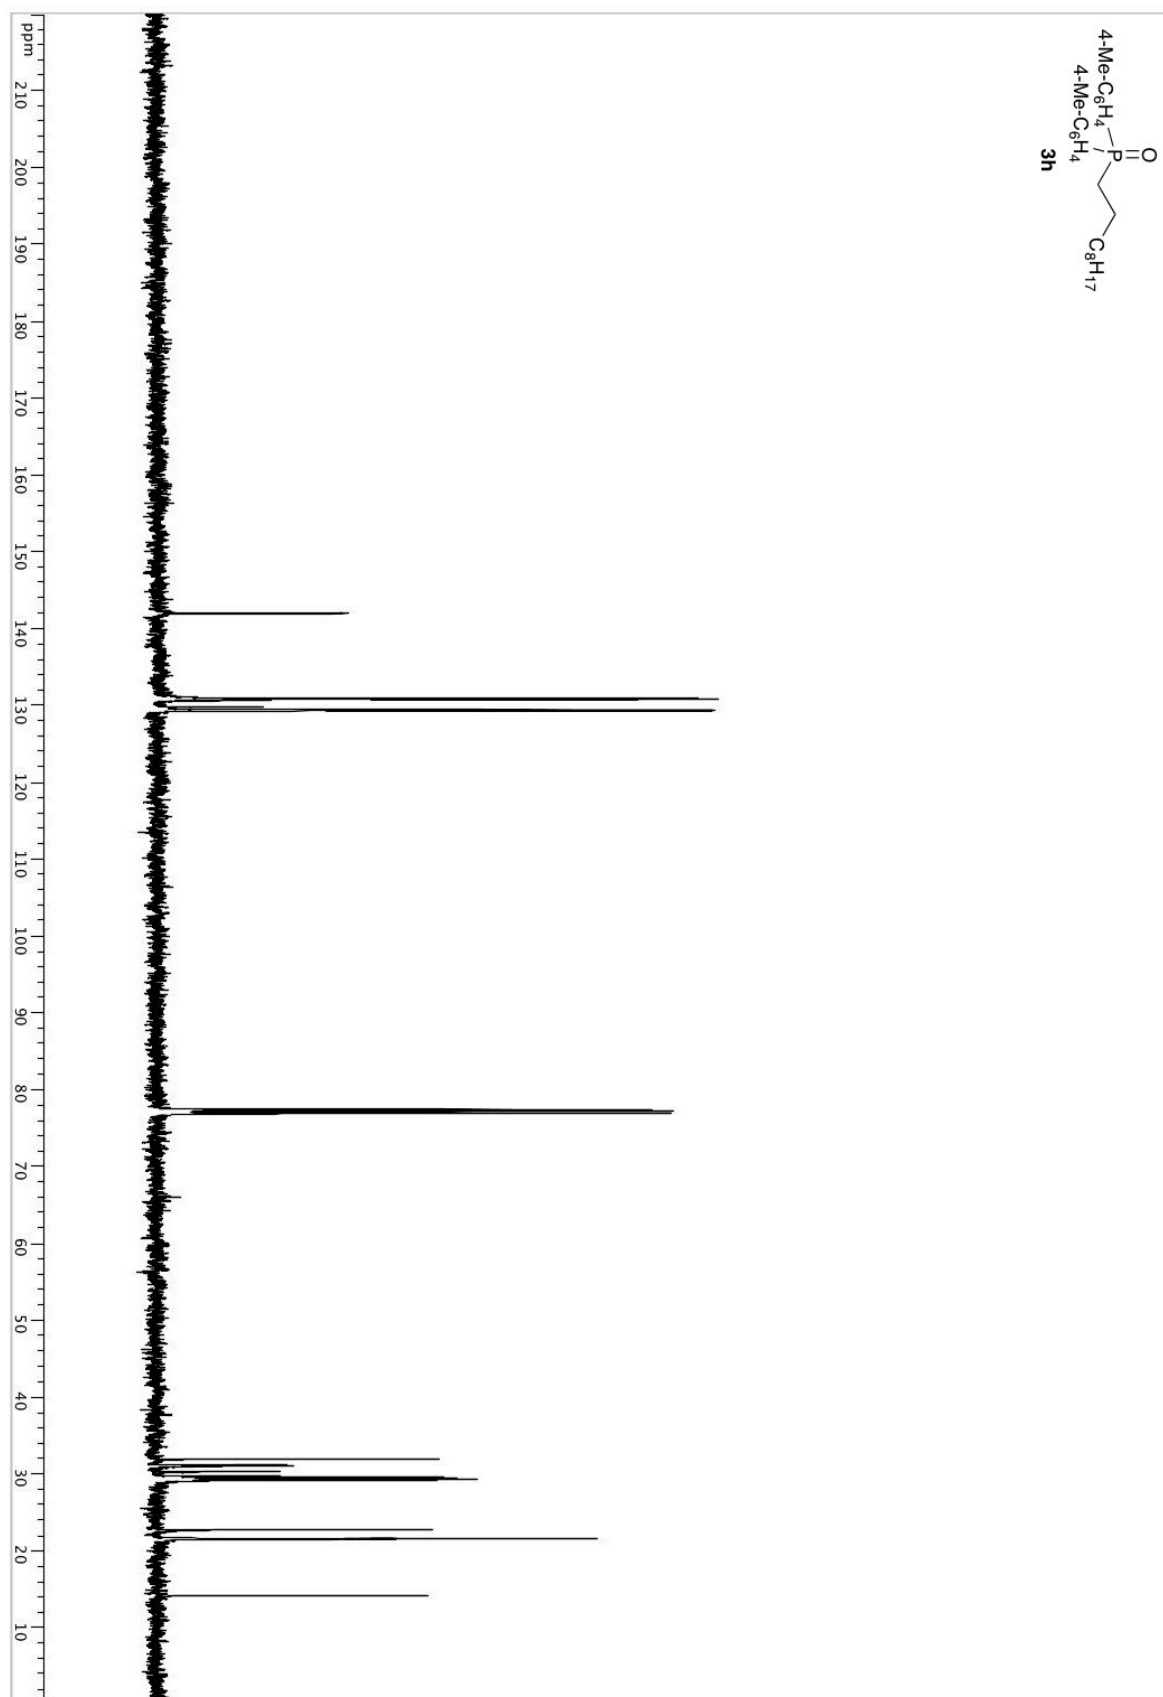

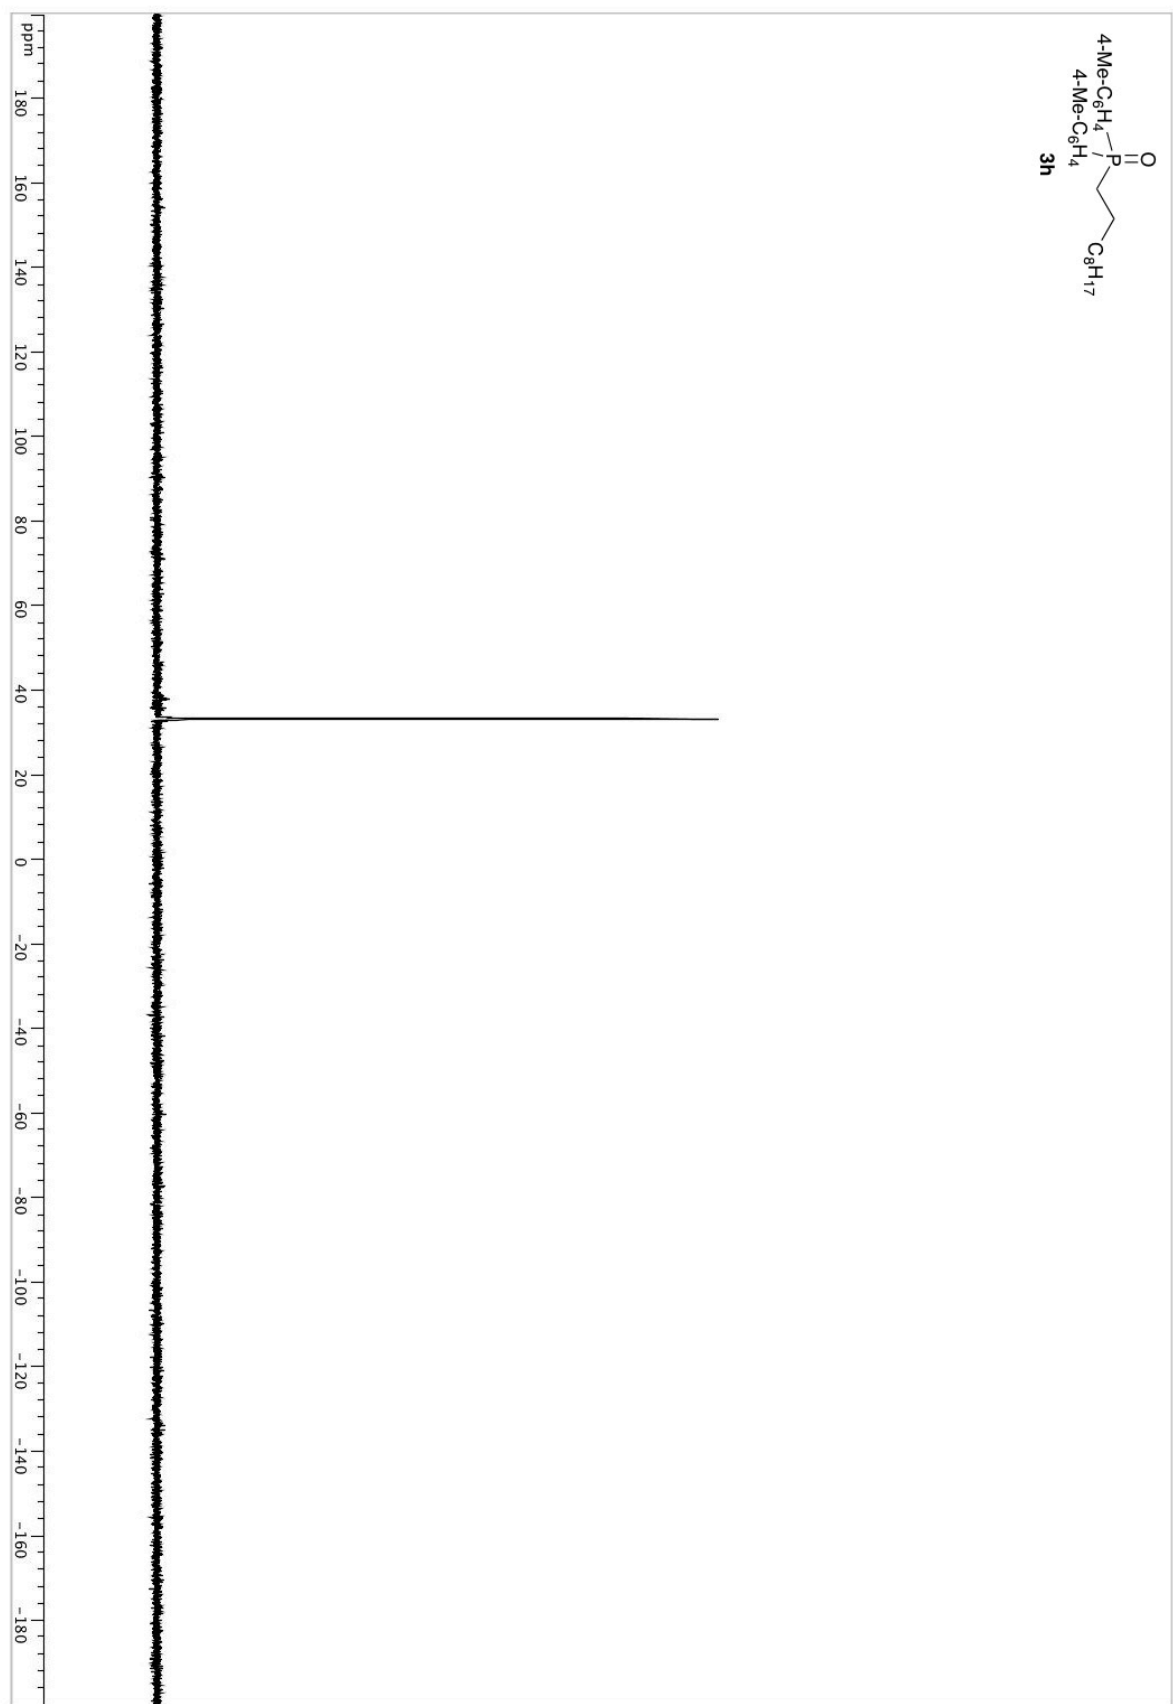

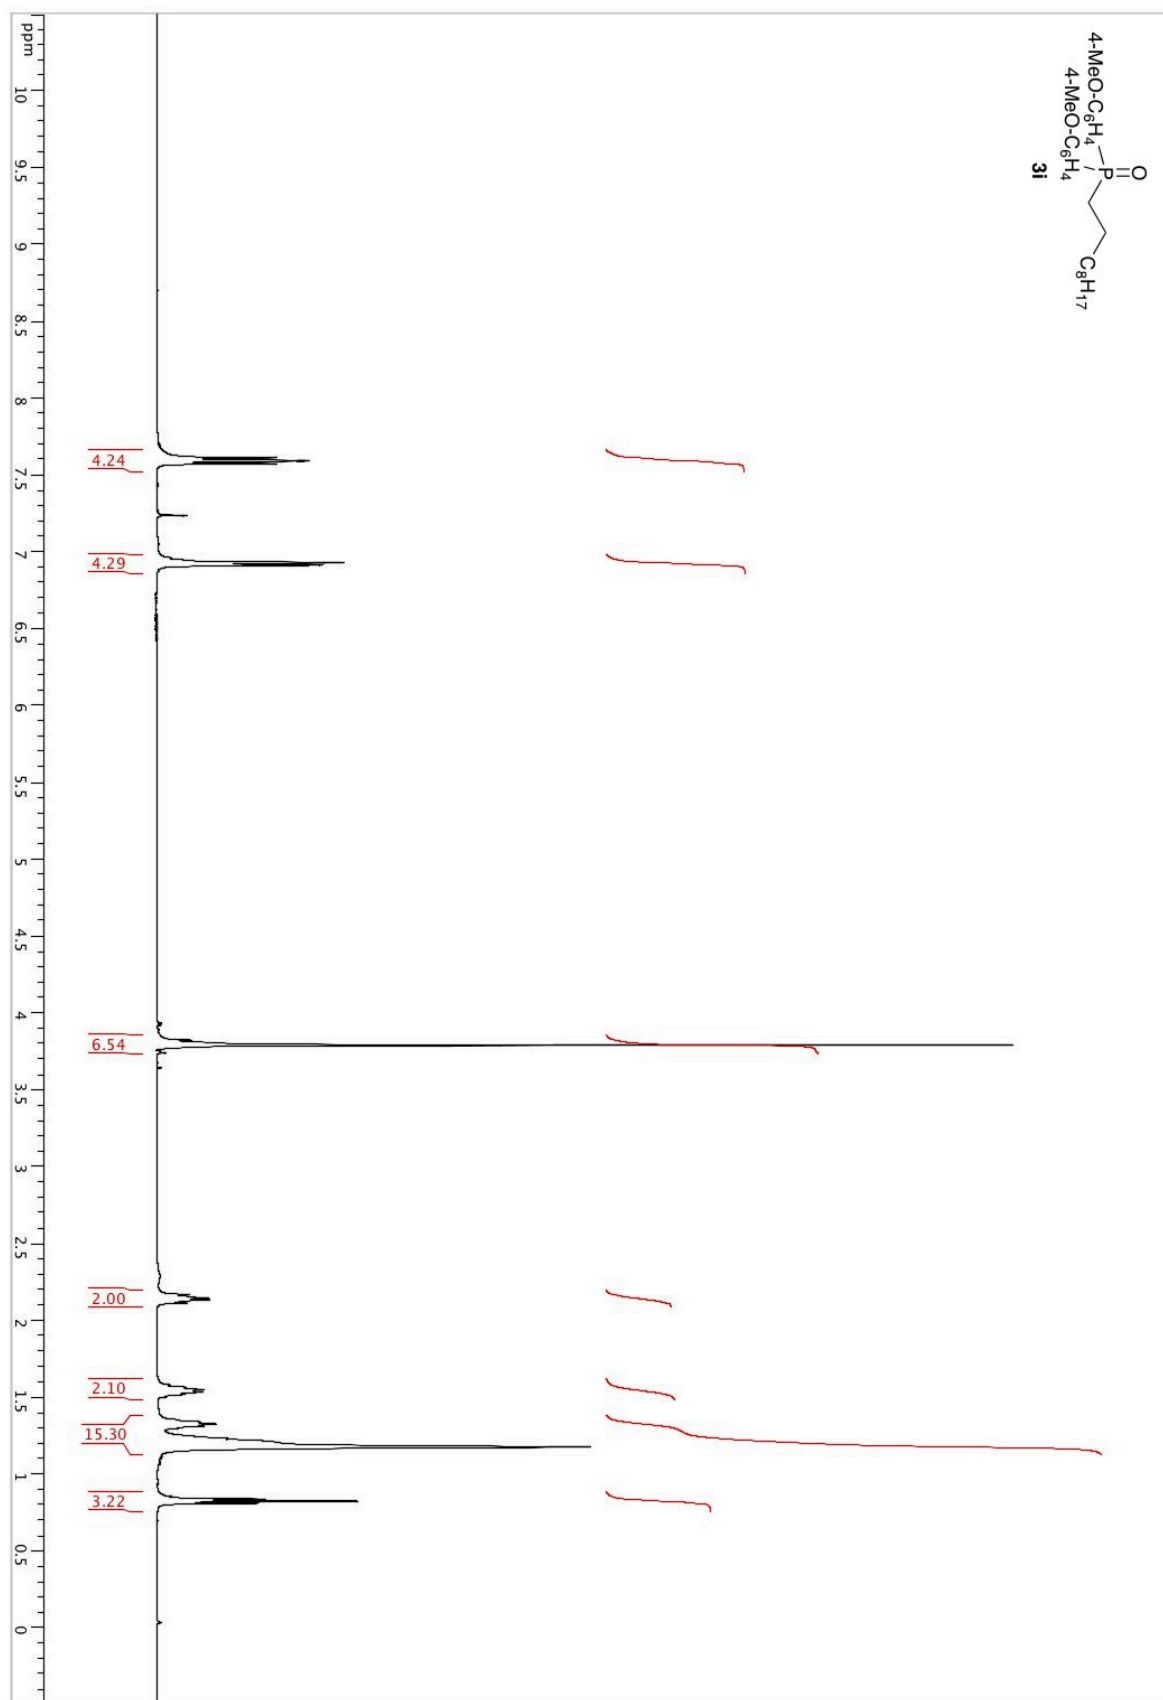

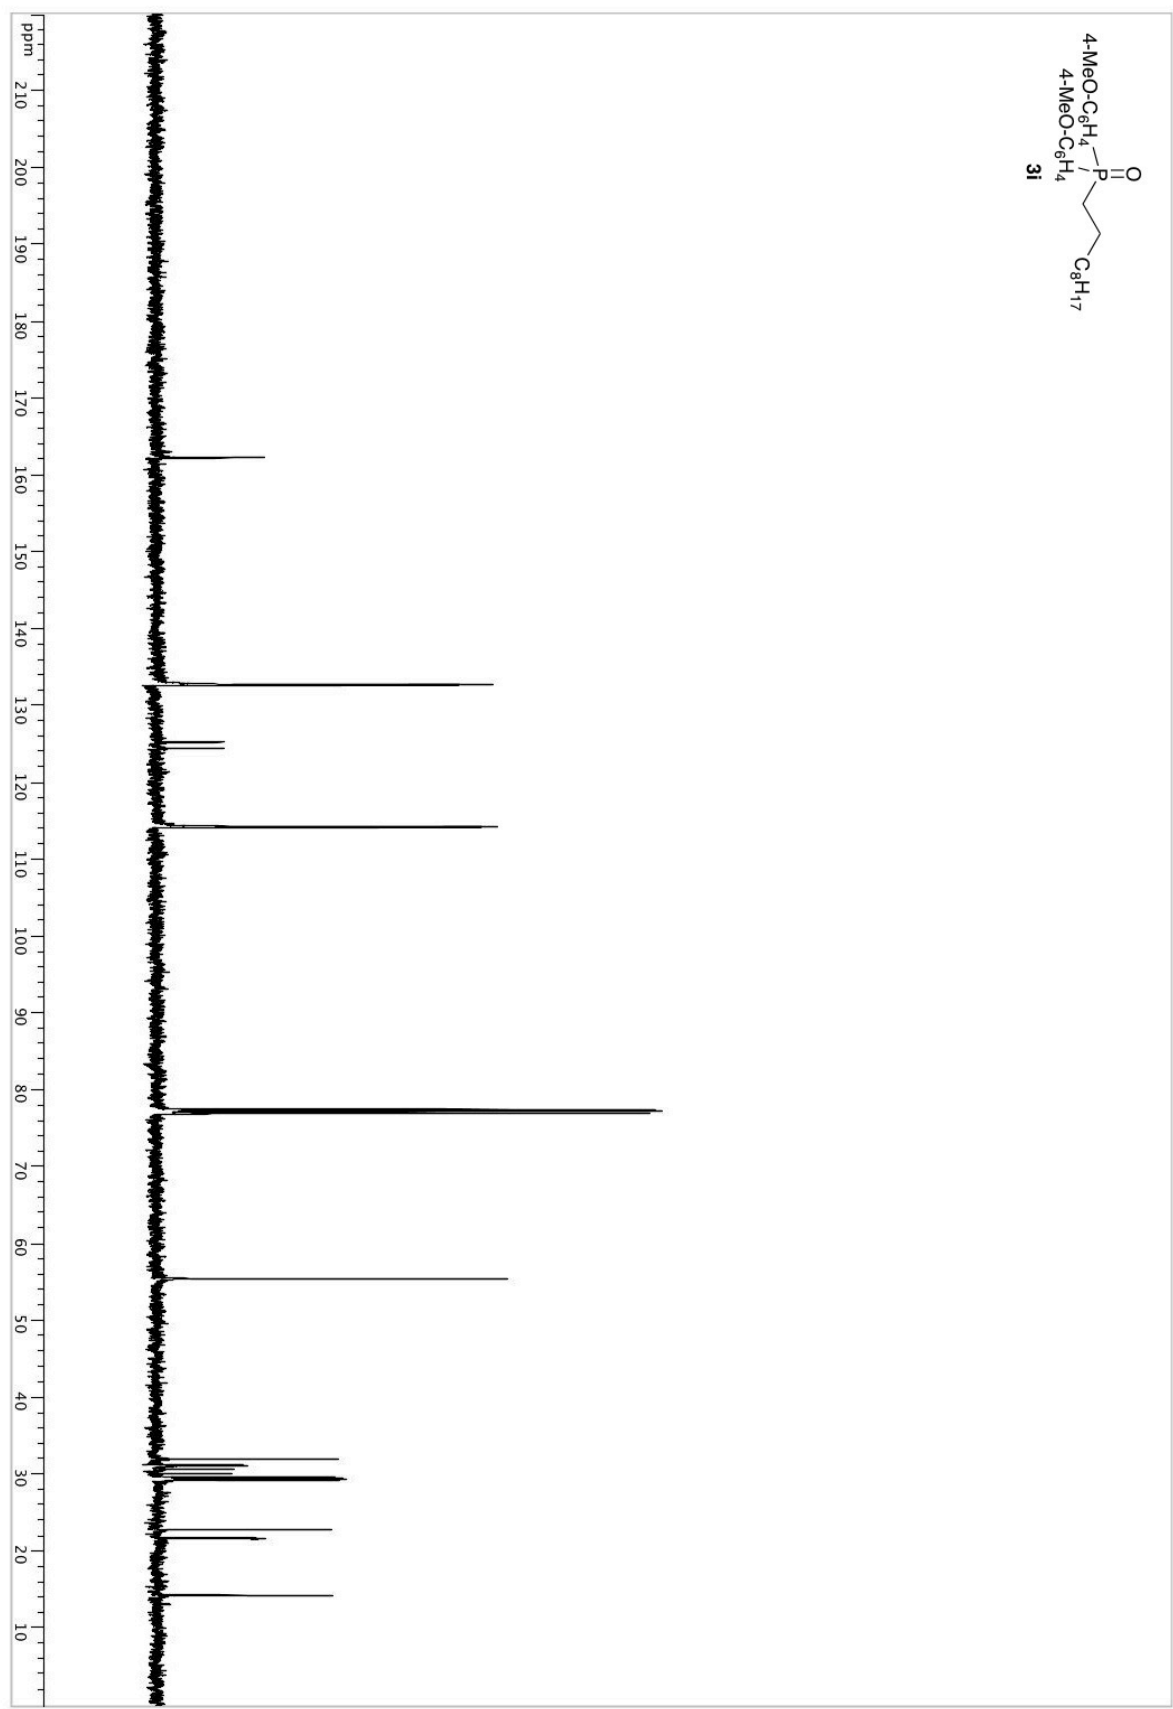



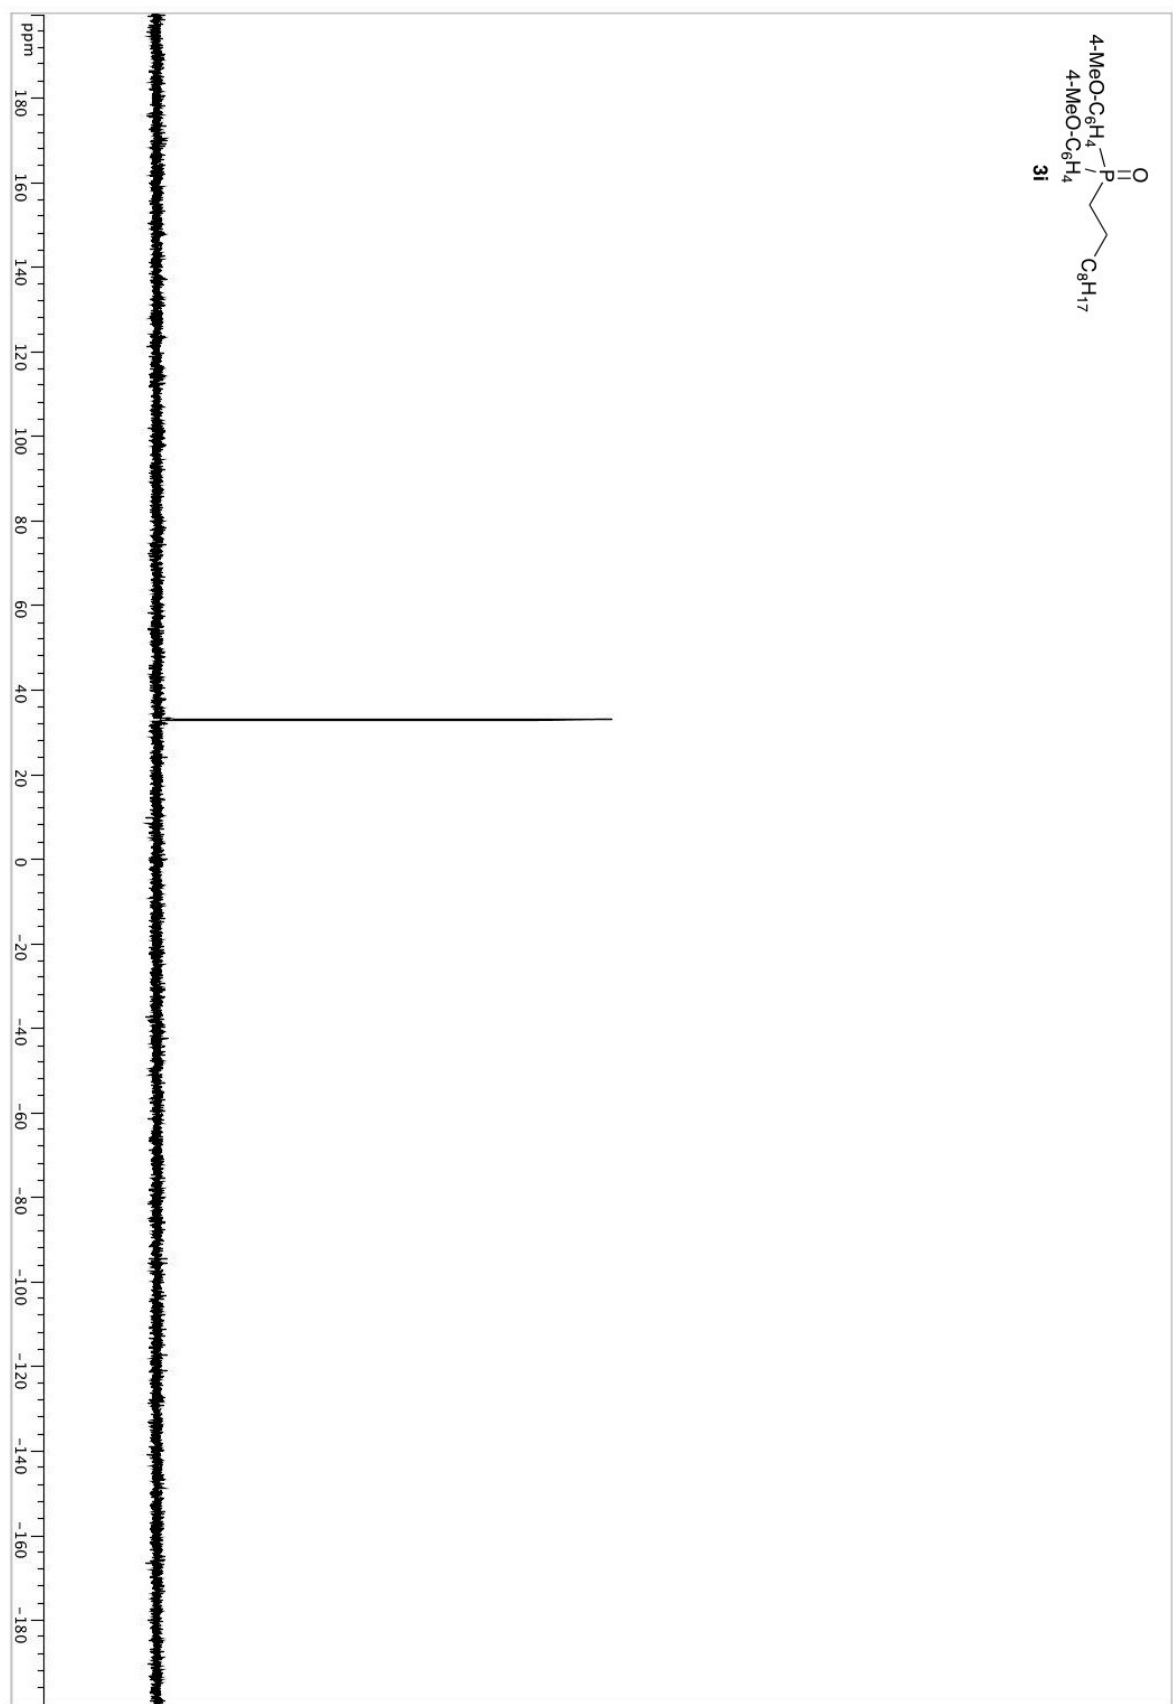

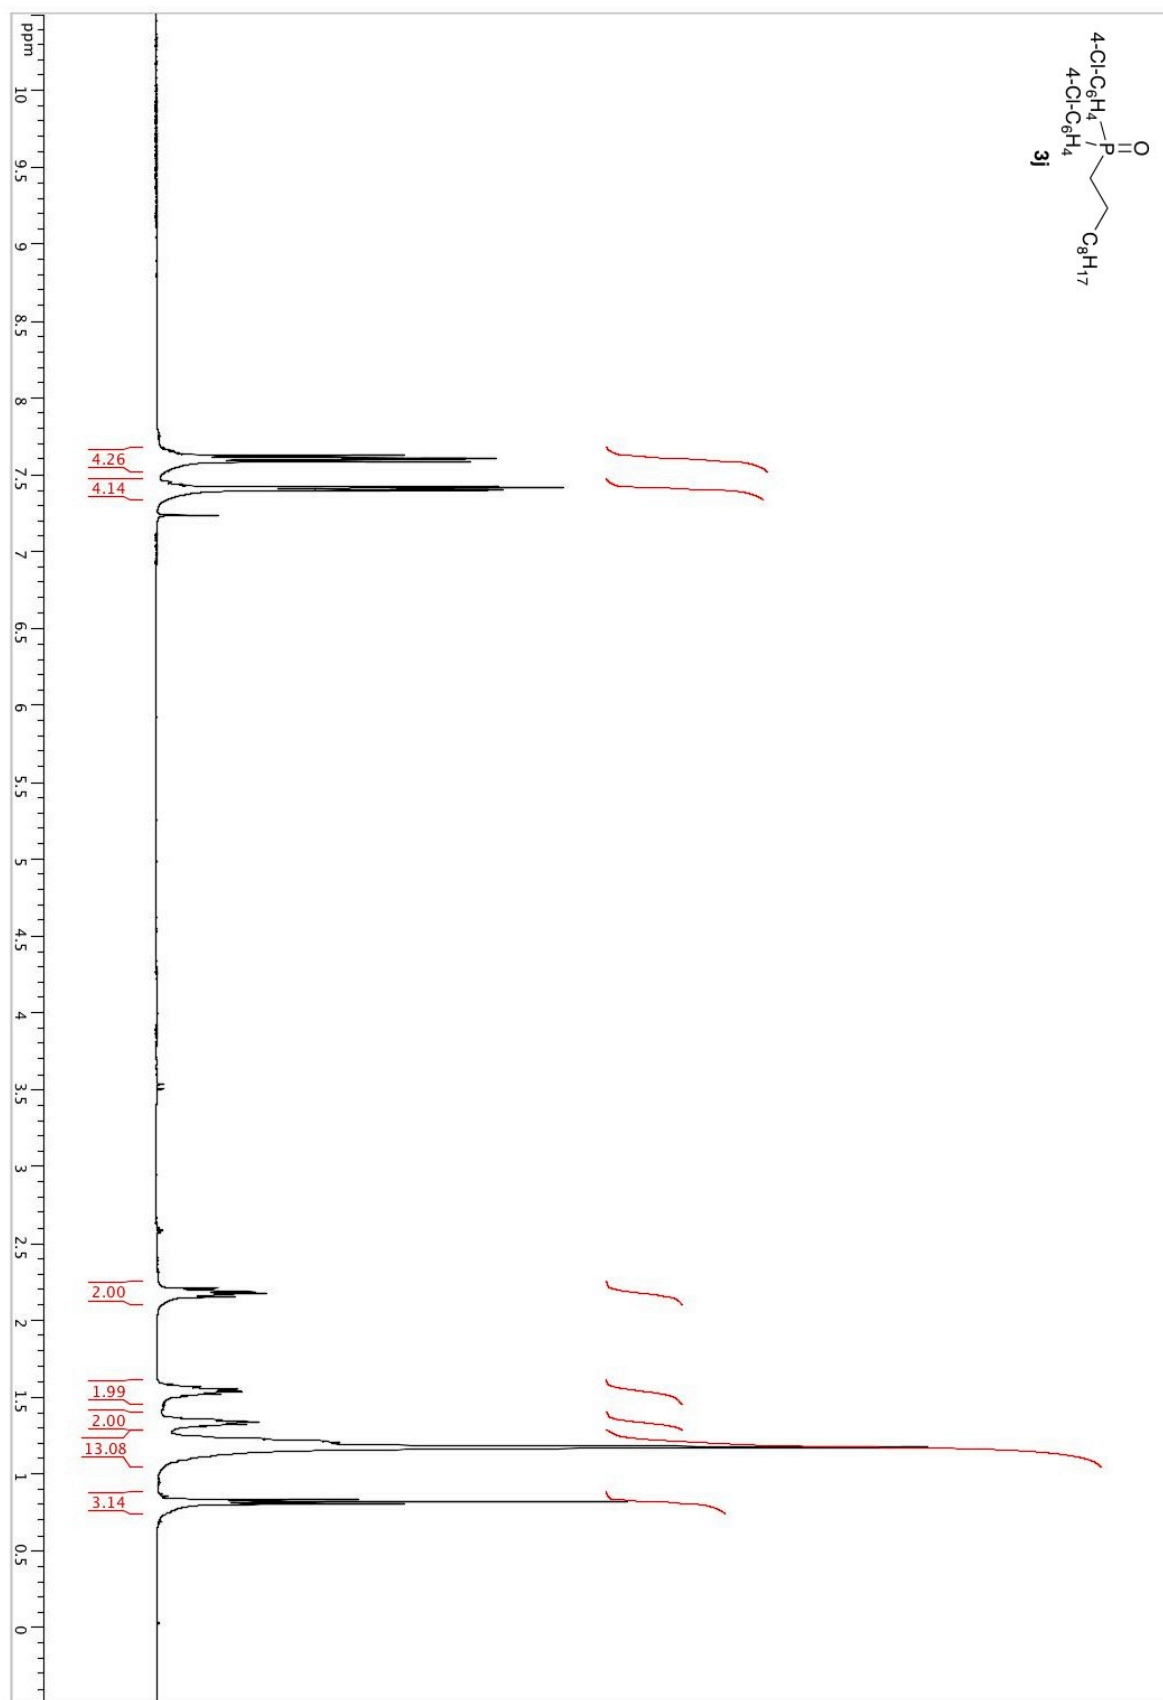

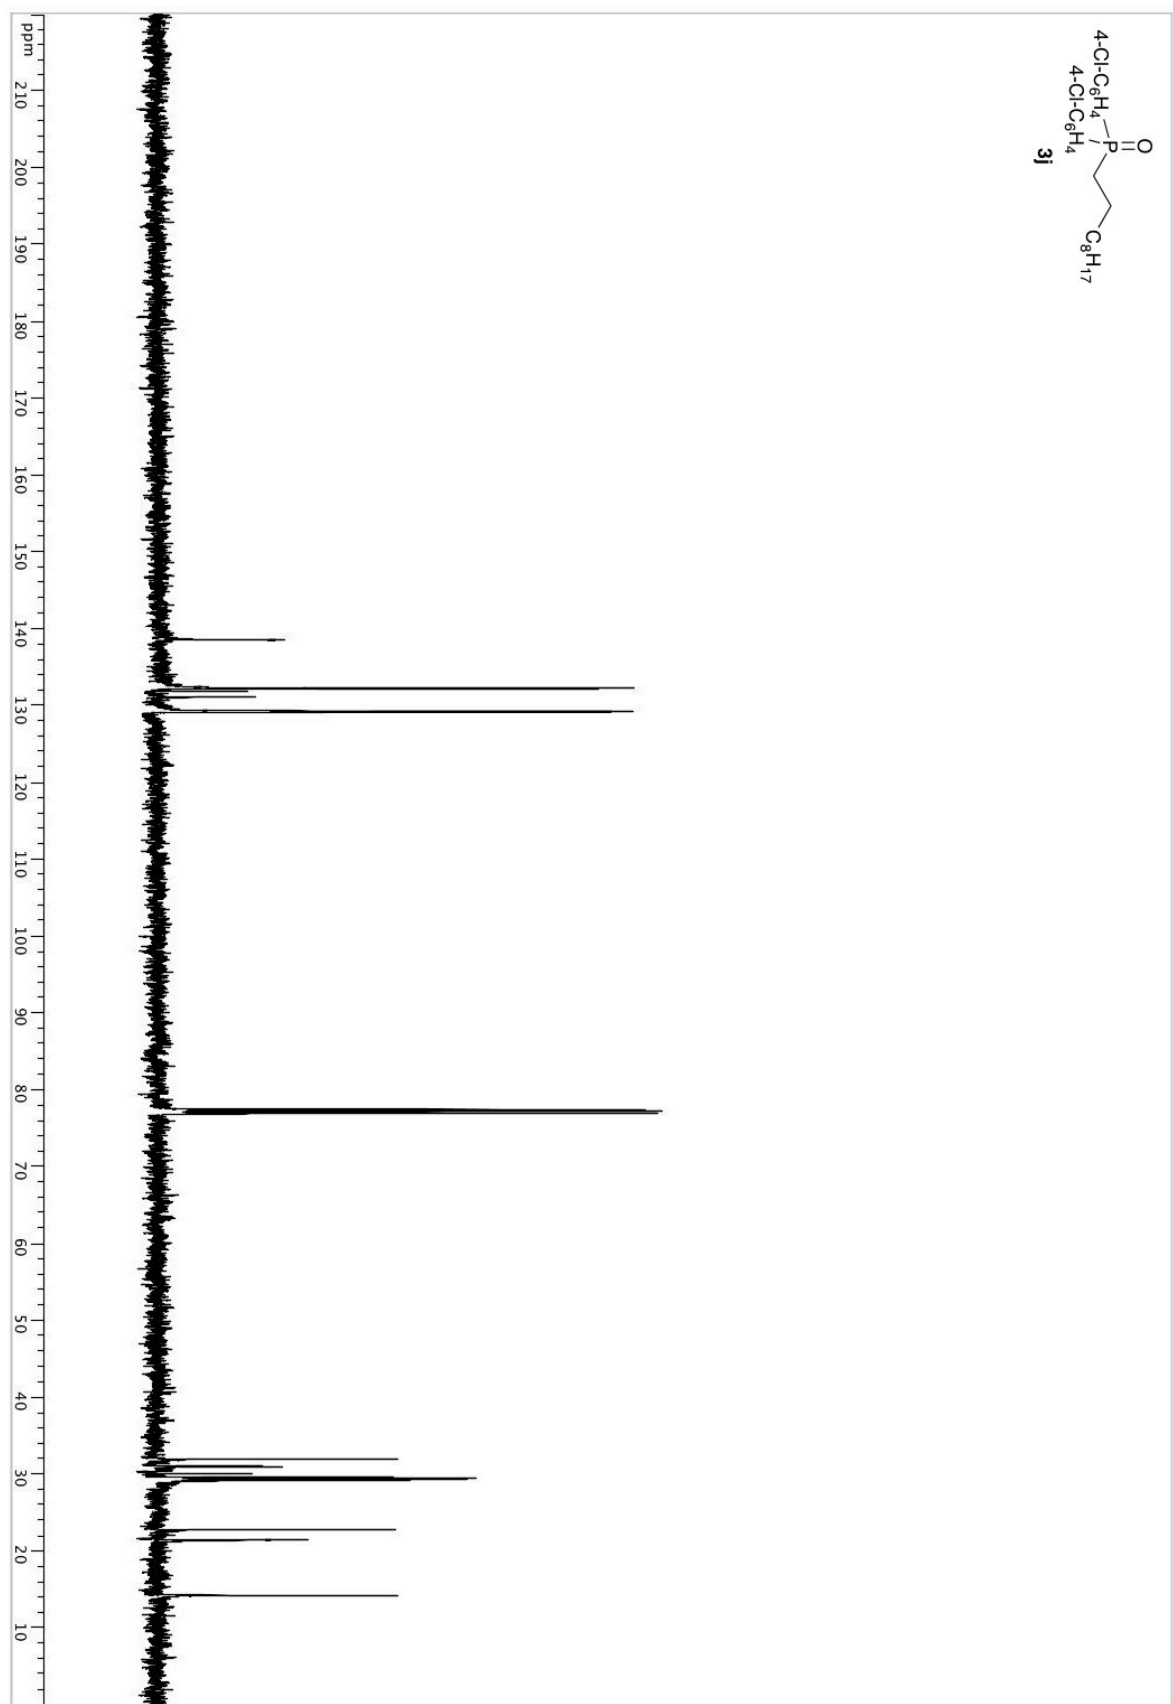

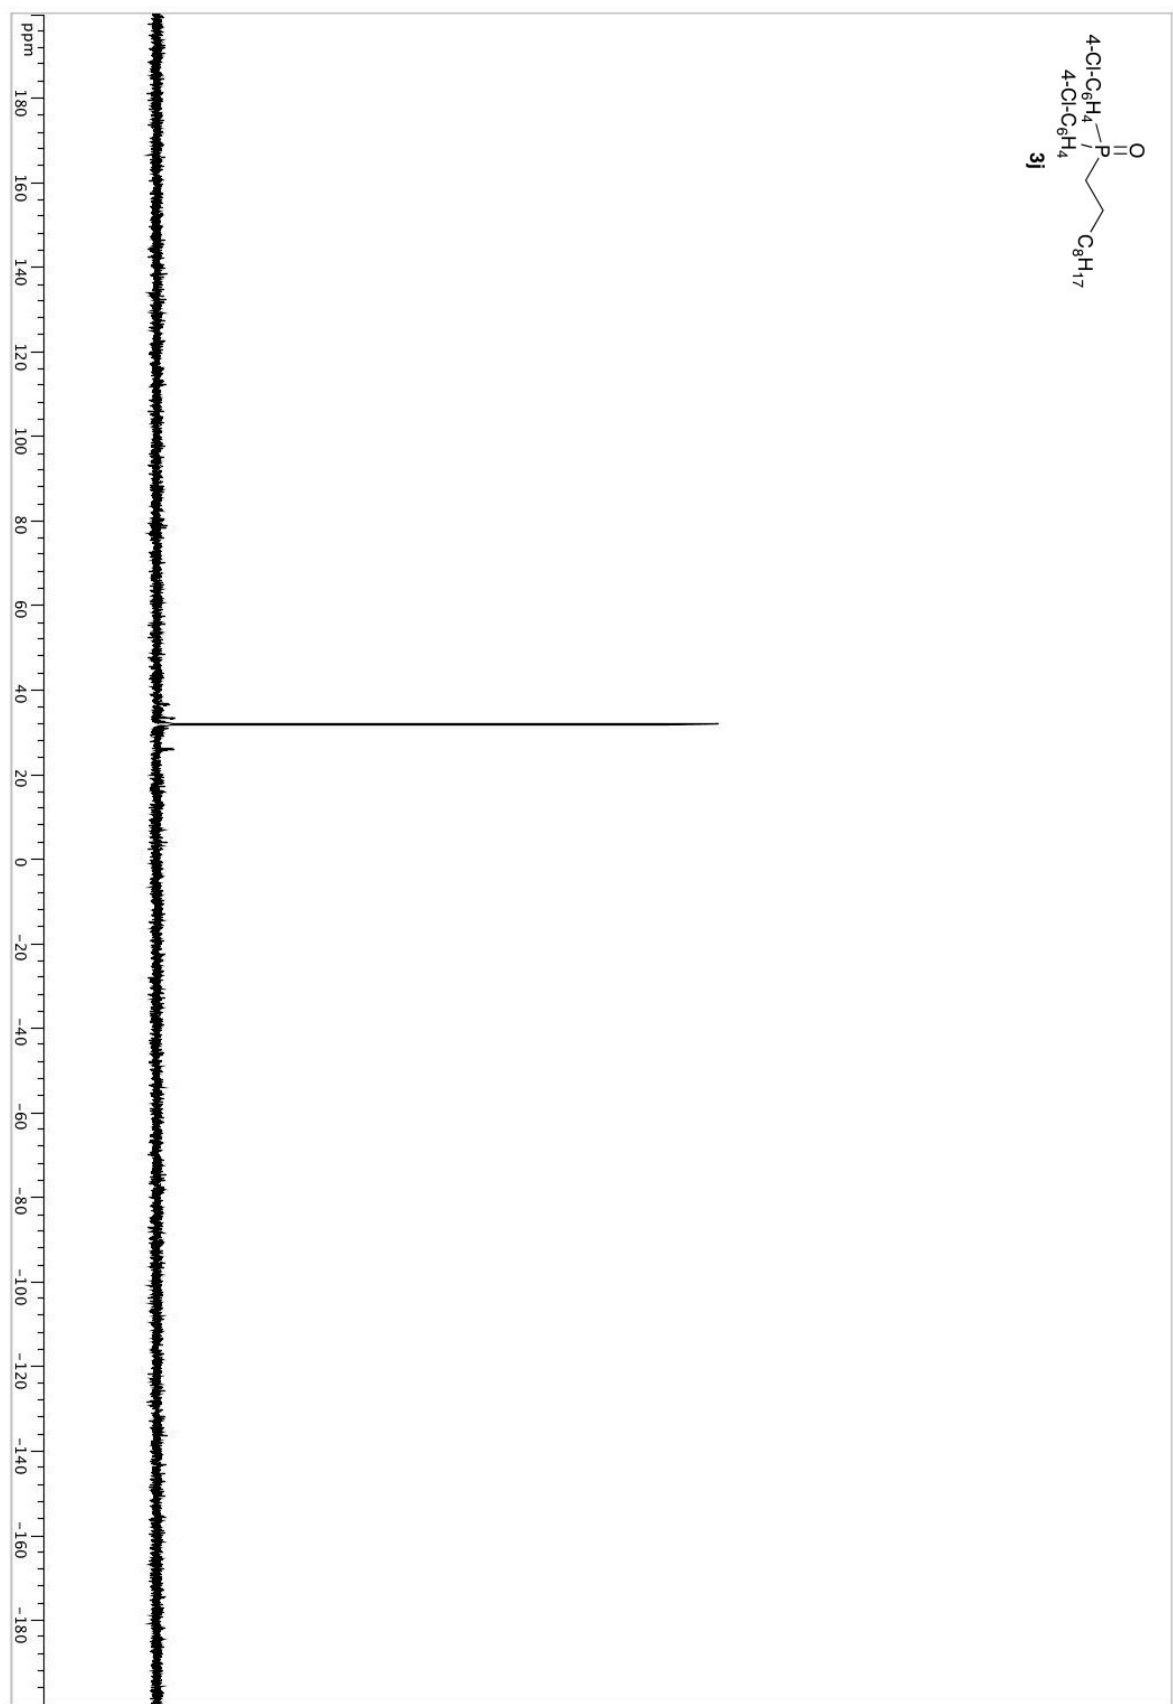

### **Part III: References**

1. C. A. Busacca, J. C. Lorenz, N. Grinberg, N. Haddad, M. Hrapchak, B. Latli, H. Lee, P. Sabila, A. Saha, M. Sarvestani, S. Shen, R. Varsolona, X. Wei and C. H. Senanayake, *Org. Lett.*, 2005, **7**, 4277.
2. T. Hirai and L.-B. Han, *Org. Lett.*, 2007, **9**, 53.
3. S. Kawaguchi, A. Nomoto, M. Sonoda and A. Ogawa, *Tetrahedron Lett.*, 2009, **50**, 624.
4. S. Yamamoto, K. Okuma and H. Ohta, *Bull. Chem. Soc. Jpn.*, 1988, **61**, 4476.
5. J. G. Uranga and A. N. Santiago, *New J. Chem.*, 2010, **34**, 2006.
